# Supplementary material for: Aneuploidy Is Associated with Azole Resistance in Aspergillus fumigatus
Source: PubMed Central journal article supplement (PMC10112202; doi:10.1128/aac.01253-22), 2023-03-28
Supplement: aac.01253-22-s0001.pdf [file aac.01253-22-s0001.pdf]

### Supplementary Table 1

Sources of additional previously published isolate sequences used in this study. Clinical isolates are mostly invasive however some were cultured from additional sources included wounds, tissues (e.g., eyes, ears, nails, and brain), body fluids, spinal specimens, and unknown (10,19,20)

| <b>Isolate</b> | <b>Accession</b> | <b>Source</b> | <b>Azole resistance</b> |
|----------------|------------------|---------------|-------------------------|
| 10/01/2002     | ERR769511        | Clinical      | Resistant               |
| 08/12/2012     | ERR769506        | Clinical      | Resistant               |
| 08-19-02       | ERR769513        | Environmental | Resistant               |
| 08-19-02       | ERR769510        | Environmental | Susceptible             |
| 08-31-08       | ERR769508        | Clinical      | Resistant               |
| 08-36-03       | ERR769507        | Clinical      | Resistant               |
| 09-750080      | ERR769502        | Clinical      | Susceptible             |
| 12-750446      | ERR769504        | Clinical      | Susceptible             |
| 12-750465      | ERR769503        | Clinical      | Susceptible             |
| 12-750505      | ERR769505        | Clinical      | Susceptible             |
| 12-750522      | ERR769501        | Clinical      | Resistant               |
| 12-750544      | ERR769500        | Clinical      | Resistant               |
| AFIS1878       | SAMN14598471     | Clinical      | Resistant               |

|            |              |               |            |
|------------|--------------|---------------|------------|
| AFIS2001   | SAMN14598491 | Clinical      | Resistant  |
| AFIS2889   | SAMN14598560 | Clinical      | Resistant  |
| B11930     | SAMN14598570 | Environmental | Resistant  |
| B11943     | SAMN14598571 | Environmental | Resistant  |
| B11951     | SAMN14598572 | Environmental | Resistant  |
| AB11957    | SAMN14598573 | Environmental | Resistant  |
| B11969     | SAMN14598576 | Environmental | Resistant  |
| B11982     | SAMN14598580 | Environmental | Resistant  |
| AF41       | SRR617720    | Clinical      | Sensitive  |
| AF72       | SRR617721    | Clinical      | Sensitive  |
| AF90       | SRR617722    |               | Resistant  |
| AFIS2254   | SAMN15356935 | Clinical      | Resistant  |
| Afu1042-09 | ERR769515    | Clinical      | Resistant  |
| Afu166-E11 | ERR769519    | Environmental | Resistant, |
| Afu218-E11 | ERR769521    | Environmental | Resistant  |
| Afu257-E11 | ERR769520    | Environmental | Resistant  |
| Afu591-12  | ERR769517    | Clinical      | Resistant  |
| Afu942-09  | ERR769514    | Clinical      | Resistant  |
| AFIS1417   | SAMN14598404 | Clinical      | Resistant  |
| AFIS1484   | SAMN14598411 | Clinical      | Resistant  |

|          |              |               |           |
|----------|--------------|---------------|-----------|
| AFIS1554 | SAMN14598427 | Clinical      | Resistant |
| AFIS1874 | SAMN14598469 | Clinical      | Resistant |
| AFIS1926 | SAMN14598480 | Clinical      | Resistant |
| AFIS2064 | SAMN14598499 | Clinical      | Resistant |
| AFIS2068 | SAMN14598503 | Clinical      | Resistant |
| AFIS2105 | SAMN14598509 | Clinical      | Resistant |
| AFIS2211 | SAMN14598525 | Clinical      | Resistant |
| AFIS2241 | SAMN14598529 | Clinical      | Resistant |
| AFIS2242 | SAMN14598530 | Clinical      | Resistant |
| AFIS2288 | SAMN14598535 | Clinical      | Resistant |
| AFIS2305 | SAMN14598538 | Clinical      | Resistant |
| AFIS2400 | SAMN14598543 | Clinical      | Resistant |
| AFIS3129 | SAMN14598563 | Clinical      | Resistant |
| BB11928  | SAMN14598569 | Environmental | Resistant |
| BB11971  | SAMN14598577 | Environmental | Resistant |
| BB11973  | SAMN14598578 | Environmental | Resistant |
| F11628   | SRR343149    | Clinical      | Resistant |
| F12865   | SRR343150    | Clinical      | Resistant |
| F13535   | SRR617726    | Clinical      | Resistant |
| F14532   | SRR617731    | Clinical      | Resistant |

|        |           |          |           |
|--------|-----------|----------|-----------|
| F15390 | SRR617733 | Clinical | Resistant |
| F17764 | SRR617745 | Clinical | Resistant |

## Supplementary Table 2

Genes in duplicated regions marked in Figure 1

| Gene ID    | Genomic Location (Gene)                        | Product Description                                                                                                                                                                                                                      |
|------------|------------------------------------------------|------------------------------------------------------------------------------------------------------------------------------------------------------------------------------------------------------------------------------------------|
| Afu2g05230 | Chr2_A_fumigatus_Af293:1,452,392..1,453,989(+) | Ortholog of A. nidulans FGSC A4 : AN2111, A. fumigatus Af293 : Afu6g03190, A. niger CBS 513.88 : An11g05190, A. oryzae RIB40 : AO09001000628, AO090003000332 and Aspergillus wentii : Aspwe1_0055162                                     |
| Afu2g05240 | Chr2_A_fumigatus_Af293:1,456,446..1,457,711(+) | Ortholog(s) have extracellular region localization                                                                                                                                                                                       |
| Afu2g05250 | Chr2_A_fumigatus_Af293:1,458,288..1,461,192(-) | putative transcription factor                                                                                                                                                                                                            |
| Afu2g05260 | Chr2_A_fumigatus_Af293:1,464,656..1,466,072(+) | Has domain(s) with predicted FAD binding, oxidoreductase activity and role in metabolic process                                                                                                                                          |
| Afu2g05270 | Chr2_A_fumigatus_Af293:1,467,280..1,468,332(-) | Ortholog of Aspergillus fumigatus A1163 : AFUB_022300                                                                                                                                                                                    |
| Afu2g05280 | Chr2_A_fumigatus_Af293:1,468,485..1,469,128(-) | protein of unknown function                                                                                                                                                                                                              |
| Afu2g05290 | Chr2_A_fumigatus_Af293:1,470,208..1,472,390(+) | Ortholog of A. nidulans FGSC A4 : AN3976, A. niger CBS 513.88 : An02g11140, Neosartorya fischeri NRRL 181 : NFIA_082050, Aspergillus wentii : Aspwe1_0592927 and Aspergillus versicolor : Aspeve1_0080485                                |
| Afu2g05300 | Chr2_A_fumigatus_Af293:1,472,472..1,473,777(+) | Ortholog of Aspergillus fumigatus A1163 : AFUB_022330                                                                                                                                                                                    |
| Afu2g05310 | Chr2_A_fumigatus_Af293:1,474,504..1,479,018(-) | Has domain(s) with predicted DNA binding, RNA polymerase II transcription factor activity, sequence-specific DNA binding, zinc ion binding activity and role in regulation of transcription, DNA-templated, transcription, DNA-templated |
| Afu2g05325 | Chr2_A_fumigatus_Af293:1,480,858..1,484,987(-) | Has domain(s) with predicted role in transmembrane transport and integral component of membrane localization                                                                                                                             |
| Afu2g05340 | Chr2_A_fumigatus_Af293:1,486,634..1,489,175(+) | Essential 1,3-beta-glucanosyltransferase, GPI-anchored to the plasma membrane                                                                                                                                                            |
| Afu2g05350 | Chr2_A_fumigatus_Af293:1,489,567..1,491,076(+) | Putative MFS transporter                                                                                                                                                                                                                 |
| Afu2g05360 | Chr2_A_fumigatus_Af293:1,491,344..1,493,915(-) | Putative C6 transcription factor                                                                                                                                                                                                         |
| Afu2g05370 | Chr2_A_fumigatus_Af293:1,495,691..1,496,482(+) | Ortholog of Aspergillus fumigatus A1163 : AFUB_022400                                                                                                                                                                                    |
| Afu2g05380 | Chr2_A_fumigatus_Af293:1,498,429..1,500,925(+) | Has domain(s) with predicted DNA binding, RNA polymerase II transcription factor activity, sequence-specific DNA binding, zinc ion binding activity and role in regulation of transcription, DNA-templated, transcription, DNA-templated |
| Afu2g05390 | Chr2_A_fumigatus_Af293:1,504,321..1,509,831(+) | Has domain(s) with predicted role in intracellular signal transduction                                                                                                                                                                   |
| Afu2g05400 | Chr2_A_fumigatus_Af293:1,510,443..1,512,936(+) | Ortholog(s) have hydrolase activity, hydrolyzing O-glycosyl compounds activity and role in xyloglucan metabolic process                                                                                                                  |
| Afu2g05410 | Chr2_A_fumigatus_Af293:1,513,346..1,516,972(-) | Ortholog of A. nidulans FGSC A4 : AN7504, A. oryzae RIB40 : AO090001000651, Aspergillus wentii : Aspwe1_0121527, Aspergillus sydowii : Aspsy1_0152683 and Aspergillus terreus NIH2624 : ATET_06731                                       |
| Afu2g05420 | Chr2_A_fumigatus_Af293:1,518,008..1,520,305(-) | Ortholog(s) have nucleolus localization                                                                                                                                                                                                  |
| Afu2g05430 | Chr2_A_fumigatus_Af293:1,520,509..1,522,677(-) | Ortholog(s) have uridine kinase activity, role in pyrimidine-containing compound salvage and cell division site, cytosol, mitotic spindle pole body, nucleus localization                                                                |
| Afu2g05440 | Chr2_A_fumigatus_Af293:1,522,761..1,524,497(+) | Ortholog(s) have cytosol, nucleus localization                                                                                                                                                                                           |
| Afu2g05450 | Chr2_A_fumigatus_Af293:1,524,596..1,527,501(-) | Mitochondrial NADH dehydrogenase involved in oxidative phosphorylation                                                                                                                                                                   |
| Afu2g05470 | Chr2_A_fumigatus_Af293:1,527,534..1,533,669(+) | Ortholog(s) have role in attachment of mitotic spindle microtubules to kinetochore, cohesin localization to chromatin, mitotic sister chromatid cohesion and negative regulation of G0 to G1 transition, more                            |
| Afu2g05480 | Chr2_A_fumigatus_Af293:1,533,897..1,534,392(+) | Ortholog(s) have RNA polymerase I activity and role in termination of RNA polymerase I transcription, transcription of nuclear large rRNA transcript from RNA polymerase I promoter                                                      |
| Afu2g05490 | Chr2_A_fumigatus_Af293:1,534,498..1,535,686(-) | Ortholog(s) have deoxyhypusine monooxygenase activity, role in microtubule cytoskeleton organization, mitochondrion distribution, peptidyl-lysine modification to peptidyl-hypusine and cytosol, nucleus localization                    |
| Afu2g05500 | Chr2_A_fumigatus_Af293:1,535,737..1,537,421(-) | Ortholog(s) have oxidoreductase activity and mitochondrion localization                                                                                                                                                                  |
| Afu2g05510 | Chr2_A_fumigatus_Af293:1,537,429..1,538,546(+) | Ortholog(s) have proton-transporting ATP synthase activity, rotational mechanism activity and role in ATP synthesis coupled proton transport                                                                                             |
| Afu2g05520 | Chr2_A_fumigatus_Af293:1,538,674..1,543,847(+) | Ortholog of A. nidulans FGSC A4 : AN7496, A. niger CBS 513.88 : An02g13860, A. oryzae RIB40 : AO090001000663, Aspergillus wentii : Aspwe1_0121457 and Aspergillus sydowii : Aspsy1_0058467                                               |
| Afu2g05530 | Chr2_A_fumigatus_Af293:1,543,958..1,546,325(-) | Ortholog(s) have H4 histone acetyltransferase activity, histone acetyltransferase activity (H3-K4 specific), peptide N-acetyltransferase activity                                                                                        |
| Afu2g05540 | Chr2_A_fumigatus_Af293:1,546,346..1,549,205(+) | Ortholog(s) have DNA binding activity, role in mRNA cis splicing, via spliceosome and Prp19 complex, cytosol, spliceosomal complex localization                                                                                          |
| Afu2g05550 | Chr2_A_fumigatus_Af293:1,549,332..1,550,996(+) | Ortholog of A. nidulans FGSC A4 : AN10943, A. niger CBS 513.88 : An02g13890, A. oryzae RIB40 : AO090001000666, Neosartorya fischeri NRRL 181 : NFIA_082270 and Aspergillus clavatus NRRL 1 : ACLA_089150                                 |
| Afu2g05560 | Chr2_A_fumigatus_Af293:1,551,103..1,552,239(+) | Putative exonuclease                                                                                                                                                                                                                     |
| Afu2g05570 | Chr2_A_fumigatus_Af293:1,552,642..1,553,462(+) | Ortholog of Aspergillus fumigatus A1163 : AFUB_022590                                                                                                                                                                                    |
| Afu2g05580 | Chr2_A_fumigatus_Af293:1,553,837..1,555,318(+) | Ortholog(s) have RNA 7-methylguanosine cap binding, exoribonuclease activator activity, m7G(5')pppN diphosphatase activity                                                                                                               |
| Afu2g05590 | Chr2_A_fumigatus_Af293:1,555,349..1,556,323(+) | Ortholog(s) have ubiquitin-specific protease activity, role in protein deubiquitination and cytosol, nucleus localization                                                                                                                |
| Afu2g05600 | Chr2_A_fumigatus_Af293:1,556,615..1,557,982(+) | Ortholog(s) have cytosol localization                                                                                                                                                                                                    |
| Afu2g05610 | Chr2_A_fumigatus_Af293:1,558,179..1,563,688(-) | Has domain(s) with predicted RNA binding, nucleic acid binding, nucleotide binding activity                                                                                                                                              |
| Afu2g05620 | Chr2_A_fumigatus_Af293:1,565,153..1,567,800(+) | Ortholog(s) have histone binding activity, role in histone exchange and Swr1 complex, cytoplasm localization                                                                                                                             |
| Afu2g05630 | Chr2_A_fumigatus_Af293:1,569,298..1,573,439(+) | Ortholog of A. nidulans FGSC A4 : AN7476, A. niger CBS 513.88 : An02g14010, A. oryzae RIB40 : AO090001000675, Aspergillus wentii : Aspwe1_0120551 and Aspergillus sydowii : Aspsy1_0058449                                               |
| Afu2g05635 | Chr2_A_fumigatus_Af293:1,573,966..1,574,332(-) | Ortholog of Neosartorya fischeri NRRL 181 : NFIA_082360 and Aspergillus fumigatus A1163 : AFUB_022660                                                                                                                                    |
| Afu2g05640 | Chr2_A_fumigatus_Af293:1,577,611..1,580,102(+) | Ortholog of A. niger CBS 513.88 : An02g14070, Neosartorya fischeri NRRL 181 : NFIA_082370, Aspergillus niger ATCC 1015 : 52472-mRNA and Aspergillus zonatus : Aspzo1_1187186                                                             |
| Afu2g05650 | Chr2_A_fumigatus_Af293:1,580,139..1,582,404(+) | Ortholog(s) have asparagine-tRNA ligase activity, role in asparaginyl-tRNA aminoacylation and cytosol localization                                                                                                                       |
| Afu2g05660 | Chr2_A_fumigatus_Af293:1,583,515..1,583,824(+) | Ortholog of Aspergillus fumigatus A1163 : AFUB_022690                                                                                                                                                                                    |
| Afu2g05670 | Chr2_A_fumigatus_Af293:1,584,647..1,587,163(+) | Ortholog(s) have poly(U) RNA binding activity, role in negative regulation of induction of conjugation with cellular fusion by negative regulation of transcription from RNA polymerase II promoter and cytosol localization             |
| Afu2g05680 | Chr2_A_fumigatus_Af293:1,588,053..1,589,891(+) | Ortholog of A. nidulans FGSC A4 : AN7481, A. niger CBS 513.88 : An02g14110, A. oryzae RIB40 : AO090001000682, Aspergillus wentii : Aspwe1_0055195 and Aspergillus sydowii : Aspsy1_0153107                                               |
| Afu2g05690 | Chr2_A_fumigatus_Af293:1,591,215..1,591,904(+) | Ortholog of A. nidulans AN7482                                                                                                                                                                                                           |
| Afu2g05700 | Chr2_A_fumigatus_Af293:1,605,250..1,607,039(-) | Ortholog of A. oryzae RIB40 : AO090001000687, Neosartorya fischeri NRRL 181 : NFIA_082420, Aspergillus clavatus NRRL 1 : ACLA_068640 and Aspergillus sydowii : Aspsy1_0090059                                                            |
| Afu2g05710 | Chr2_A_fumigatus_Af293:1,607,602..1,609,176(-) | Ortholog of A. nidulans FGSC A4 : AN4092, AN7483, A. oryzae RIB40 : AO090001000688, Neosartorya fischeri NRRL 181 : NFIA_082430 and Aspergillus versicolor : Aspeve1_0043503                                                             |
| Afu2g05720 | Chr2_A_fumigatus_Af293:1,609,920..1,610,516(+) | Ortholog of A. nidulans FGSC A4 : AN7484, A. niger CBS 513.88 : An02g14170, A. oryzae RIB40 : AO090001000689, Aspergillus wentii : Aspwe1_0046318 and Aspergillus sydowii : Aspsy1_0153479                                               |
| Afu2g05730 | Chr2_A_fumigatus_Af293:1,611,708..1,615,086(+) | Putative siderophore transporter                                                                                                                                                                                                         |
| Afu2g05740 | Chr2_A_fumigatus_Af293:1,616,839..1,619,693(+) | Putative Rho-type GTPase                                                                                                                                                                                                                 |
| Afu2g05750 | Chr2_A_fumigatus_Af293:1,619,718..1,621,557(-) | Ortholog(s) have endoplasmic reticulum, fungal-type vacuole localization                                                                                                                                                                 |
| Afu2g05760 | Chr2_A_fumigatus_Af293:1,621,987..1,623,626(+) | Putative beta-ketoacyl synthase                                                                                                                                                                                                          |
| Afu2g05770 | Chr2_A_fumigatus_Af293:1,624,008..1,625,427(+) | Ortholog(s) have SAGA complex localization                                                                                                                                                                                               |
| Afu2g05780 | Chr2_A_fumigatus_Af293:1,626,128..1,627,375(+) | Ortholog(s) have mRNA guanylyltransferase activity, role in 7-methylguanosine RNA capping and nucleus localization                                                                                                                       |
| Afu2g05790 | Chr2_A_fumigatus_Af293:1,627,793..1,629,694(-) | Oligosaccharyl transferase alpha subunit                                                                                                                                                                                                 |
| Afu2g05800 | Chr2_A_fumigatus_Af293:1,629,700..1,632,631(+) | Ortholog(s) have cytoplasm localization                                                                                                                                                                                                  |

|            |                                                |                                                                                                                                                                                                                                                 |
|------------|------------------------------------------------|-------------------------------------------------------------------------------------------------------------------------------------------------------------------------------------------------------------------------------------------------|
| Afu2g05810 | Chr2_A_fumigatus_Af293:1,632,693..1,634,195(-) | Putative diene lactone hydrolase                                                                                                                                                                                                                |
| Afu2g05820 | Chr2_A_fumigatus_Af293:1,634,833..1,635,629(-) | Ortholog(s) have riboflavin kinase activity, zinc ion binding activity, role in FMN biosynthetic process, riboflavin metabolic process and cytosol, mitochondrial inner membrane, nucleus localization                                          |
| Afu2g05830 | Chr2_A_fumigatus_Af293:1,636,448..1,638,778(-) | Putative transcription factor involved in regulation of gluconeogenesis and acquisition of iron                                                                                                                                                 |
| Afu2g05840 | Chr2_A_fumigatus_Af293:1,641,567..1,643,827(+) | Putative MFS multidrug transporter                                                                                                                                                                                                              |
| Afu2g05850 | Chr2_A_fumigatus_Af293:1,644,731..1,647,324(-) | Ortholog(s) have role in double-strand break repair via homologous recombination, mitotic sister chromatid cohesion and horsetail nucleus leading edge, nuclear mitotic cohesin complex localization                                            |
| Afu2g05860 | Chr2_A_fumigatus_Af293:1,647,574..1,651,778(+) | Putative golgi apparatus Ca2+/Mn2+ P-type ATPase                                                                                                                                                                                                |
| Afu2g05870 | Chr2_A_fumigatus_Af293:1,653,255..1,653,580(+) | Ortholog of <i>Aspergillus fumigatus</i> A1163 : AFUB_022910                                                                                                                                                                                    |
| Afu2g05880 | Chr2_A_fumigatus_Af293:1,654,974..1,656,856(+) | Putative ammonium transporter                                                                                                                                                                                                                   |
| Afu2g05890 | Chr2_A_fumigatus_Af293:1,657,282..1,660,256(-) | Ortholog(s) have role in CVT pathway, establishment of cell polarity, filamentous growth of a population of unicellular organisms, pexophagy, retrograde transport, vesicle recycling within Golgi                                              |
| Afu2g05900 | Chr2_A_fumigatus_Af293:1,660,444..1,662,493(+) | Ortholog(s) have protein deacetylase activity and role in chromatin silencing at centromere outer repeat region, chromatin silencing at rDNA, chromatin silencing at telomere, histone H3-K9 deacetylation, phenotypic switching                |
| Afu2g05910 | Chr2_A_fumigatus_Af293:1,662,852..1,664,600(+) | Putative hexokinase                                                                                                                                                                                                                             |
| Afu2g05920 | Chr2_A_fumigatus_Af293:1,665,690..1,666,031(+) | Ortholog of <i>Neosartorya fischeri</i> NRRL 181 : NFIA_082640 and <i>Aspergillus fumigatus</i> A1163 : AFUB_022960                                                                                                                             |
| Afu2g05930 | Chr2_A_fumigatus_Af293:1,666,230..1,668,765(-) | Ortholog(s) have small-subunit processome localization                                                                                                                                                                                          |
| Afu2g05940 | Chr2_A_fumigatus_Af293:1,668,966..1,670,774(-) | Ortholog(s) have fungal-type vacuole membrane localization                                                                                                                                                                                      |
| Afu2g05950 | Chr2_A_fumigatus_Af293:1,670,845..1,671,953(-) | Ortholog(s) have U3 snoRNA binding, U4 snRNA binding activity and role in mRNA splicing, via spliceosome, maturation of SSU-rRNA from tricistronic rRNA transcript (SSU-rRNA, 5.8S rRNA, LSU-rRNA)                                              |
| Afu2g05960 | Chr2_A_fumigatus_Af293:1,672,720..1,673,466(-) | Has domain(s) with predicted nucleic acid binding, nucleotide binding activity                                                                                                                                                                  |
| Afu2g05970 | Chr2_A_fumigatus_Af293:1,674,090..1,680,055(+) | Has domain(s) with predicted zinc ion binding activity                                                                                                                                                                                          |
| Afu2g05980 | Chr2_A_fumigatus_Af293:1,680,066..1,683,275(-) | Ortholog of <i>S. cerevisiae</i> : TDA6, <i>A. nidulans</i> FGSC A4 : AN7454, <i>A. niger</i> CBS 513.88 : An02g14280, <i>A. oryzae</i> RIB40 : AO090001000716 and <i>Aspergillus wentii</i> : Aspwe1_0055229                                   |
| Afu2g05990 | Chr2_A_fumigatus_Af293:1,683,648..1,690,695(+) | Ortholog of <i>A. nidulans</i> FGSC A4 : AN7453, <i>A. niger</i> CBS 513.88 : An02g14270, <i>Aspergillus wentii</i> : Aspwe1_0032863, <i>Aspergillus sydowii</i> : Aspsy1_0090031 and <i>Aspergillus terreus</i> NIH2624 : ATET_06789           |
| Afu2g06000 | Chr2_A_fumigatus_Af293:1,696,007..1,700,187(+) | Putative NAD+ dependent glutamate dehydrogenase                                                                                                                                                                                                 |
| Afu2g06010 | Chr2_A_fumigatus_Af293:1,701,552..1,702,608(+) | Ortholog of <i>Aspergillus fumigatus</i> A1163 : AFUB_023090                                                                                                                                                                                    |
| Afu2g06020 | Chr2_A_fumigatus_Af293:1,702,686..1,705,138(-) | Ortholog(s) have role in mitochondrial respiratory chain complex I assembly                                                                                                                                                                     |
| Afu2g06030 | Chr2_A_fumigatus_Af293:1,705,489..1,706,456(+) | Ortholog(s) have structural constituent of ribosome activity and mitochondrial small ribosomal subunit localization                                                                                                                             |
| Afu2g06040 | Chr2_A_fumigatus_Af293:1,706,470..1,708,794(+) | Putative actin cortical patch component                                                                                                                                                                                                         |
| Afu2g06050 | Chr2_A_fumigatus_Af293:1,709,213..1,712,606(+) | Ortholog of <i>A. nidulans</i> FGSC A4 : AN10954, <i>A. niger</i> CBS 513.88 : An02g14630, <i>A. oryzae</i> RIB40 : AO090001000720, AO090113000187 and <i>Aspergillus tubingensis</i> : Asptu1_0042313                                          |
| Afu2g06060 | Chr2_A_fumigatus_Af293:1,713,004..1,714,478(+) | Ortholog(s) have transcription coactivator activity, role in histone acetylation, transcription from RNA polymerase II promoter and Ada2/Gcn5/Ada3 transcription activator complex, SAGA complex, SLIK (SAGA-like) complex localization         |
| Afu2g06070 | Chr2_A_fumigatus_Af293:1,715,248..1,718,524(-) | Ortholog(s) have role in mRNA cis splicing, via spliceosome and U4/U6 x U5 tri-snRNP complex localization                                                                                                                                       |
| Afu2g06080 | Chr2_A_fumigatus_Af293:1,718,679..1,722,146(-) | Ortholog(s) have cytosol, nucleus localization                                                                                                                                                                                                  |
| Afu2g06090 | Chr2_A_fumigatus_Af293:1,722,228..1,725,911(+) | Ortholog(s) have nucleus localization                                                                                                                                                                                                           |
| Afu2g06100 | Chr2_A_fumigatus_Af293:1,726,894..1,729,986(-) | Ortholog of <i>A. nidulans</i> FGSC A4 : AN7443, <i>A. niger</i> CBS 513.88 : An02g14710, <i>A. oryzae</i> RIB40 : AO090001000726, <i>Aspergillus wentii</i> : Aspwe1_0110234 and <i>Aspergillus sydowii</i> : Aspsy1_0152786                   |
| Afu2g06110 | Chr2_A_fumigatus_Af293:1,733,688..1,735,660(+) | Ortholog(s) have role in chromatin silencing at centromere, histone acetylation, histone exchange, mitotic sister chromatid biorientation and Ino80 complex, NuA4 histone acetyltransferase complex, Swr1 complex localization                  |
| Afu2g06120 | Chr2_A_fumigatus_Af293:1,735,733..1,738,887(-) | Ortholog of <i>A. nidulans</i> FGSC A4 : AN7433, <i>A. niger</i> CBS 513.88 : An02g14760, <i>Aspergillus wentii</i> : Aspwe1_0110312, <i>Aspergillus sydowii</i> : Aspsy1_0153514 and <i>Aspergillus terreus</i> NIH2624 : ATET_05606           |
| Afu2g06130 | Chr2_A_fumigatus_Af293:1,740,097..1,742,242(-) | Has domain(s) with predicted DNA binding, zinc ion binding activity, role in transcription, DNA-templated and nucleus localization                                                                                                              |
| Afu2g06140 | Chr2_A_fumigatus_Af293:1,742,740..1,744,237(+) | uracil DNA N-glycosylase, putative                                                                                                                                                                                                              |
| Afu2g06150 | Chr2_A_fumigatus_Af293:1,744,786..1,746,985(-) | Putative protein disulfide isomerase                                                                                                                                                                                                            |
| Afu2g06160 | Chr2_A_fumigatus_Af293:1,747,870..1,750,485(-) | Ortholog of <i>Aspergillus fumigatus</i> A1163 : AFUB_023240                                                                                                                                                                                    |
| Afu2g06170 | Chr2_A_fumigatus_Af293:1,752,414..1,755,226(-) | Ortholog(s) have L-amino acid transmembrane transporter activity, role in L-alpha-amino acid transmembrane transport and fungal-type vacuole membrane localization                                                                              |
| Afu2g06180 | Chr2_A_fumigatus_Af293:1,755,388..1,759,465(+) | Has domain(s) with predicted RNA polymerase II transcription cofactor activity, role in regulation of transcription from RNA polymerase II promoter and mediator complex localization                                                           |
| Afu2g06190 | Chr2_A_fumigatus_Af293:1,759,842..1,762,130(-) | Ortholog(s) have DNA-directed DNA polymerase activity, double-stranded DNA binding, single-stranded DNA binding activity                                                                                                                        |
| Afu2g06200 | Chr2_A_fumigatus_Af293:1,762,681..1,764,118(+) | Ortholog(s) have role in CENP-A containing nucleosome assembly, chromatin maintenance, chromatin silencing at centromere, mitotic sister chromatid segregation and nucleoplasm localization                                                     |
| Afu2g06205 | Chr2_A_fumigatus_Af293:1,764,499..1,765,197(-) | Ortholog of <i>A. niger</i> CBS 513.88 : An02g14850, <i>A. oryzae</i> RIB40 : AO090001000738, <i>Aspergillus wentii</i> : Aspwe1_0028348, <i>Aspergillus clavatus</i> NRRL 1 : ACLA_068110 and <i>Aspergillus niger</i> ATCC 1015 : 175113-mRNA |
| Afu2g06220 | Chr2_A_fumigatus_Af293:1,791,120..1,794,643(-) | Ortholog(s) have nucleus localization                                                                                                                                                                                                           |
| Afu2g06230 | Chr2_A_fumigatus_Af293:1,794,669..1,796,803(-) | Ortholog(s) have glutaminase activity, imidazoleglycerol-phosphate synthase activity, role in histidine biosynthetic process and cytosol, nucleus localization                                                                                  |
| Afu2g06240 | Chr2_A_fumigatus_Af293:1,797,448..1,799,650(-) | Ortholog(s) have dCMP deaminase activity, role in dTMP biosynthetic process, dUMP biosynthetic process and cytosol, nucleus localization                                                                                                        |
| Afu2g06250 | Chr2_A_fumigatus_Af293:1,799,951..1,802,480(+) | Ortholog(s) have Atg12 activating enzyme activity, Atg8 activating enzyme activity                                                                                                                                                              |
| Afu2g06260 | Chr2_A_fumigatus_Af293:1,802,669..1,805,601(+) | Ortholog of <i>Aspergillus fumigatus</i> A1163 : AFUB_023340                                                                                                                                                                                    |

| Gene ID    | Genomic Location (Gene)                    | Product Description                                                                                                                                                                                                                      |
|------------|--------------------------------------------|------------------------------------------------------------------------------------------------------------------------------------------------------------------------------------------------------------------------------------------|
| Afu5g00100 | Chr5_A_fumigatus_Af293:1,474..2,924(-)     | Ortholog of A. nidulans FGSC A4 : AN9205, AN9209, A. fumigatus Af293 : Afu8g01840, Afu7g06523, A. niger CBS 513.88 : An05g01030, An13g03050, An16g01380 and A. oryzae RIB40 : AO090012000290, AO090011000069                             |
| Afu5g00110 | Chr5_A_fumigatus_Af293:3,119..5,290(-)     | Putative squalene-hopene-cyclase                                                                                                                                                                                                         |
| Afu5g00120 | Chr5_A_fumigatus_Af293:5,839..7,498(+)     | Putative cytochrome P450 oxidoreductase/alkane hydroxylase                                                                                                                                                                               |
| Afu5g00130 | Chr5_A_fumigatus_Af293:8,045..9,220(+)     | Ortholog of A. nidulans FGSC A4 : AN5461, A. niger CBS 513.88 : An01g00570, Aspergillus wentii : Aspwe1_0022994, Aspergillus versicolor : Aspve1_0039792 and Aspergillus clavatus NRRL 1 : ACLA_024300                                   |
| Afu5g00135 | Chr5_A_fumigatus_Af293:9,314..10,498(-)    | Ortholog(s) have transcription factor activity, RNA polymerase II core promoter proximal region sequence-specific binding activity                                                                                                       |
| Afu5g00145 | Chr5_A_fumigatus_Af293:15,749..16,327(-)   | Conserved protein of unknown function                                                                                                                                                                                                    |
| Afu5g00150 | Chr5_A_fumigatus_Af293:17,759..18,612(+)   | Has domain(s) with predicted hydrolase activity, acting on ester bonds activity and role in biosynthetic process                                                                                                                         |
| Afu5g00155 | Chr5_A_fumigatus_Af293:19,084..21,497(-)   | protein of unknown function                                                                                                                                                                                                              |
| Afu5g00160 | Chr5_A_fumigatus_Af293:24,489..25,947(+)   | Has domain(s) with predicted role in transmembrane transport and integral component of membrane localization                                                                                                                             |
| Afu5g00170 | Chr5_A_fumigatus_Af293:32,869..33,471(-)   | protein of unknown function                                                                                                                                                                                                              |
| Afu5g00180 | Chr5_A_fumigatus_Af293:34,623..35,952(+)   | Has domain(s) with predicted membrane localization                                                                                                                                                                                       |
| Afu5g00190 | Chr5_A_fumigatus_Af293:37,838..38,262(-)   | Ortholog of Aspergillus acidus : Aspfo1_0144348                                                                                                                                                                                          |
| Afu5g00200 | Chr5_A_fumigatus_Af293:41,963..42,498(-)   | protein of unknown function                                                                                                                                                                                                              |
| Afu5g00210 | Chr5_A_fumigatus_Af293:46,426..46,989(-)   | protein of unknown function                                                                                                                                                                                                              |
| Afu5g00220 | Chr5_A_fumigatus_Af293:49,116..49,679(+)   | Ortholog of Aspergillus kawachii : Asпка1_0183260 and Aspergillus niger ATCC 1015 : 184254-mRNA                                                                                                                                          |
| Afu5g00230 | Chr5_A_fumigatus_Af293:50,766..52,564(+)   | protein of unknown function                                                                                                                                                                                                              |
| Afu5g00240 | Chr5_A_fumigatus_Af293:59,436..59,855(-)   | protein of unknown function                                                                                                                                                                                                              |
| Afu5g00250 | Chr5_A_fumigatus_Af293:60,204..61,033(-)   | protein of unknown function                                                                                                                                                                                                              |
| Afu5g00260 | Chr5_A_fumigatus_Af293:63,859..64,734(+)   | Has domain(s) with predicted oxidoreductase activity and role in oxidation-reduction process                                                                                                                                             |
| Afu5g00280 | Chr5_A_fumigatus_Af293:78,168..80,411(+)   | Has domain(s) with predicted substrate-specific transmembrane transporter activity, transmembrane transporter activity, role in transmembrane transport and integral component of membrane, membrane localization                        |
| Afu5g00290 | Chr5_A_fumigatus_Af293:81,096..84,172(-)   | Has domain(s) with predicted RNA polymerase II transcription factor activity, sequence-specific DNA binding, zinc ion binding activity, role in regulation of transcription, DNA-templated and nucleus localization                      |
| Afu5g00300 | Chr5_A_fumigatus_Af293:85,519..87,104(-)   | Has domain(s) with predicted oxidoreductase activity, transferase activity, transferring acyl groups other than amino-acyl groups, zinc ion binding activity and role in oxidation-reduction process                                     |
| Afu5g00310 | Chr5_A_fumigatus_Af293:87,674..90,270(-)   | Putative flavin-containing monooxygenase                                                                                                                                                                                                 |
| Afu5g00320 | Chr5_A_fumigatus_Af293:91,159..91,528(-)   | Ortholog of Aspergillus fumigatus A1163 : AFUB_048770                                                                                                                                                                                    |
| Afu5g00330 | Chr5_A_fumigatus_Af293:91,964..93,063(+)   | Has domain(s) with predicted ATP binding, catalytic activity                                                                                                                                                                             |
| Afu5g00340 | Chr5_A_fumigatus_Af293:93,541..98,243(-)   | Has domain(s) with predicted ATP binding, ATPase activity, coupled to transmembrane movement of substances, nucleoside-triphosphatase activity, nucleotide binding activity and role in transmembrane transport                          |
| Afu5g00352 | Chr5_A_fumigatus_Af293:98,367..100,516(+)  | Has domain(s) with predicted catalytic activity and role in metabolic process                                                                                                                                                            |
| Afu5g00370 | Chr5_A_fumigatus_Af293:102,374..103,829(+) | Has domain(s) with predicted role in transmembrane transport and membrane localization                                                                                                                                                   |
| Afu5g00380 | Chr5_A_fumigatus_Af293:105,691..107,442(-) | Ortholog(s) have intracellular localization                                                                                                                                                                                              |
| Afu5g00390 | Chr5_A_fumigatus_Af293:109,419..112,168(+) | Ortholog of A. nidulans FGSC A4 : AN3986, AN0094, A. fumigatus Af293 : Afu5g12080, Afu7g04811 and A. niger CBS 513.88 : An01g14540, An18g02250, An13g01370, An12g06190, An02g04420                                                       |
| Afu5g00400 | Chr5_A_fumigatus_Af293:113,522..114,899(-) | Has domain(s) with predicted catalytic activity, pyridoxal phosphate binding activity and role in biosynthetic process                                                                                                                   |
| Afu5g00410 | Chr5_A_fumigatus_Af293:115,692..117,567(-) | Ortholog(s) have intracellular localization                                                                                                                                                                                              |
| Afu5g00420 | Chr5_A_fumigatus_Af293:118,071..119,830(+) | Has domain(s) with predicted role in transmembrane transport and integral component of membrane localization                                                                                                                             |
| Afu5g00430 | Chr5_A_fumigatus_Af293:121,699..123,740(-) | Has domain(s) with predicted role in transmembrane transport and integral component of membrane localization                                                                                                                             |
| Afu5g00435 | Chr5_A_fumigatus_Af293:124,091..125,971(+) | Has domain(s) with predicted RNA polymerase II transcription factor activity, sequence-specific DNA binding, zinc ion binding activity, role in regulation of transcription, DNA-templated and nucleus localization                      |
| Afu5g00440 | Chr5_A_fumigatus_Af293:126,018..126,892(-) | Has domain(s) with predicted N-acetyltransferase activity                                                                                                                                                                                |
| Afu5g00460 | Chr5_A_fumigatus_Af293:129,099..130,723(-) | Has domain(s) with predicted oxidoreductase activity and role in oxidation-reduction process                                                                                                                                             |
| Afu5g00470 | Chr5_A_fumigatus_Af293:132,072..133,983(+) | General amidase                                                                                                                                                                                                                          |
| Afu5g00480 | Chr5_A_fumigatus_Af293:134,985..137,235(+) | Has domain(s) with predicted hydrolase activity, hydrolyzing O-glycosyl compounds activity and role in carbohydrate metabolic process                                                                                                    |
| Afu5g00490 | Chr5_A_fumigatus_Af293:139,561..141,100(+) | Ortholog of Aspergillus fumigatus A1163 : AFUB_048950                                                                                                                                                                                    |
| Afu5g00500 | Chr5_A_fumigatus_Af293:144,344..146,547(-) | Has domain(s) with predicted transmembrane transporter activity, role in transmembrane transport and integral component of membrane localization                                                                                         |
| Afu5g00510 | Chr5_A_fumigatus_Af293:147,684..149,094(-) | Ortholog of A. niger CBS 513.88 : An06g02400, Aspergillus brasiliensis : Aspbr1_0031922, Neosartorya fischeri NRRL 181 : NFIA_042000 and Aspergillus fumigatus A1163 : AFUB_048980                                                       |
| Afu5g00520 | Chr5_A_fumigatus_Af293:149,332..151,518(+) | Has domain(s) with predicted DNA binding, RNA polymerase II transcription factor activity, sequence-specific DNA binding, zinc ion binding activity and role in regulation of transcription, DNA-templated, transcription, DNA-templated |
| Afu5g00530 | Chr5_A_fumigatus_Af293:151,569..153,420(-) | Ortholog(s) have inulinase activity and role in carbohydrate metabolic process                                                                                                                                                           |
| Afu5g00540 | Chr5_A_fumigatus_Af293:154,401..155,764(-) | Ortholog of A. fumigatus Af293 : Afu3g14910, Neosartorya fischeri NRRL 181 : NFIA_041970, NFIA_062340, Aspergillus wentii : Aspwe1_0435722 and Aspergillus versicolor : Aspve1_0042882                                                   |
| Afu5g00550 | Chr5_A_fumigatus_Af293:157,167..158,726(-) | Has domain(s) with predicted catalytic activity, hydrolase activity, hydrolyzing O-glycosyl compounds activity and role in carbohydrate metabolic process                                                                                |
| Afu5g00560 | Chr5_A_fumigatus_Af293:160,463..161,658(-) | Ortholog of Neosartorya fischeri NRRL 181 : NFIA_041940 and Aspergillus fumigatus A1163 : AFUB_049030                                                                                                                                    |
| Afu5g00570 | Chr5_A_fumigatus_Af293:162,664..165,353(+) | Ortholog of Aspergillus fumigatus A1163 : AFUB_049040                                                                                                                                                                                    |
| Afu5g00580 | Chr5_A_fumigatus_Af293:165,766..167,189(-) | Ortholog of Neosartorya fischeri NRRL 181 : NFIA_041910 and Aspergillus fumigatus A1163 : AFUB_049050                                                                                                                                    |
| Afu5g00590 | Chr5_A_fumigatus_Af293:167,534..168,580(-) | Ortholog of A. niger CBS 513.88 : An15g07140, An13g01800, Neosartorya fischeri NRRL 181 : NFIA_023890, NFIA_041900 and Aspergillus wentii : Aspwe1_0039567, Aspwe1_0040764, Aspwe1_0044902                                               |
| Afu5g00600 | Chr5_A_fumigatus_Af293:169,273..170,037(-) | Ortholog(s) have extracellular region localization                                                                                                                                                                                       |
| Afu5g00610 | Chr5_A_fumigatus_Af293:170,630..172,252(-) | Has domain(s) with predicted peroxidase activity                                                                                                                                                                                         |
| Afu5g00620 | Chr5_A_fumigatus_Af293:174,613..176,319(+) | Ortholog of Aspergillus fumigatus A1163 : AFUB_049090                                                                                                                                                                                    |
| Afu5g00630 | Chr5_A_fumigatus_Af293:177,277..179,441(+) | Has domain(s) with predicted flavin adenine dinucleotide binding, oxidoreductase activity, acting on CH-OH group of donors activity and role in oxidation-reduction process                                                              |
| Afu5g00640 | Chr5_A_fumigatus_Af293:179,606..180,880(-) | Ortholog(s) have glyoxysome localization                                                                                                                                                                                                 |
| Afu5g00650 | Chr5_A_fumigatus_Af293:182,686..184,205(-) | protein of unknown function                                                                                                                                                                                                              |
| Afu5g00660 | Chr5_A_fumigatus_Af293:188,199..189,638(-) | Ortholog of Aspergillus fumigatus A1163 : AFUB_049130                                                                                                                                                                                    |

| Gene ID    | Genomic Location (Gene)                    | Product Description                                                                                                                                                                                                                     |
|------------|--------------------------------------------|-----------------------------------------------------------------------------------------------------------------------------------------------------------------------------------------------------------------------------------------|
| Afu5g00800 | Chr5_A_fumigatus_Af293:219,876..222,265(+) | Ortholog of Neosartorya fischeri NRRL 181 : NFIA_041390 and Aspergillus fumigatus A1163 : AFUB_049260                                                                                                                                   |
| Afu5g00810 | Chr5_A_fumigatus_Af293:223,385..224,504(+) | Ortholog of Neosartorya fischeri NRRL 181 : NFIA_041360, Aspergillus fumigatus A1163 : AFUB_049270 and Aspergillus clavatus NRRL 1 : ACLA_004420                                                                                        |
| Afu5g00820 | Chr5_A_fumigatus_Af293:226,212..228,359(+) | Ortholog of A. fumigatus Af293 : Afu6g14570, A. oryzae RIB40 : AO090009000539, Aspergillus wentii : Aspwe1_0037901, Aspergillus sydowii : Aspsy1_0044497 and Aspergillus terreus NIH2624 : ATET_07141                                   |
| Afu5g00830 | Chr5_A_fumigatus_Af293:228,632..230,413(-) | Ortholog of A. nidulans FGSC A4 : AN10390, AN3286, A. fumigatus Af293 : Afu4g01280, A. niger CBS 513.88 : An12g00980, An11g04090, An06g00150 and A. oryzae RIB40 : AO090138000050, AO090010000179                                       |
| Afu5g00840 | Chr5_A_fumigatus_Af293:230,969..232,898(+) | Ortholog of A. nidulans FGSC A4 : AN5639, AN2587, AN9444, AN7395, A. niger CBS 513.88 : An03g01000, A. oryzae RIB40 : AO090102000018 and Aspergillus wentii : Aspwe1_0065350, Aspwe1_0153928, Aspwe1_0178709                            |
| Afu5g00860 | Chr5_A_fumigatus_Af293:234,649..235,431(-) | protein of unknown function                                                                                                                                                                                                             |
| Afu5g00870 | Chr5_A_fumigatus_Af293:236,240..236,663(+) | Ortholog of Aspergillus fumigatus A1163 : AFUB_049320                                                                                                                                                                                   |
| Afu5g00890 | Chr5_A_fumigatus_Af293:237,323..238,237(+) | protein of unknown function                                                                                                                                                                                                             |
| Afu5g00900 | Chr5_A_fumigatus_Af293:238,540..239,406(+) | Putative RgsA paralogue                                                                                                                                                                                                                 |
| Afu5g00910 | Chr5_A_fumigatus_Af293:239,708..240,114(-) | Ortholog of A. nidulans FGSC A4 : AN1567, Neosartorya fischeri NRRL 181 : NFIA_041260, Aspergillus wentii : Aspwe1_0149298 and Aspergillus versicolor : Aspve1_0045271, Aspve1_0151961                                                  |
| Afu5g00920 | Chr5_A_fumigatus_Af293:241,535..242,761(+) | Ortholog(s) have intracellular localization                                                                                                                                                                                             |
| Afu5g00930 | Chr5_A_fumigatus_Af293:242,866..244,662(+) | Ortholog(s) have L-proline transmembrane transporter activity, role in proline transport and fungal-type vacuole, plasma membrane localization                                                                                          |
| Afu5g00940 | Chr5_A_fumigatus_Af293:244,784..245,314(-) | protein of unknown function                                                                                                                                                                                                             |
| Afu5g00950 | Chr5_A_fumigatus_Af293:245,858..247,667(+) | Has domain(s) with predicted RNA polymerase II transcription factor activity, sequence-specific DNA binding, transcription factor activity, sequence-specific DNA binding, zinc ion binding activity                                    |
| Afu5g00960 | Chr5_A_fumigatus_Af293:247,752..249,860(-) | Ortholog of A. nidulans FGSC A4 : AN4040, AN7213, A. niger CBS 513.88 : An18g01180, An10g00910, An11g01220, An01g11560 and A. oryzae RIB40 : AO090026000375, AO090023000615, AO090166000079                                             |
| Afu5g00975 | Chr5_A_fumigatus_Af293:249,921..250,620(+) | Ortholog(s) have extracellular region localization                                                                                                                                                                                      |
| Afu5g00980 | Chr5_A_fumigatus_Af293:254,324..255,862(+) | Has domain(s) with predicted role in transmembrane transport and integral component of membrane localization                                                                                                                            |
| Afu5g00990 | Chr5_A_fumigatus_Af293:256,002..256,245(+) | Ortholog of Aspergillus fumigatus A1163 : AFUB_049430                                                                                                                                                                                   |
| Afu5g01000 | Chr5_A_fumigatus_Af293:256,276..256,850(+) | Putative oxidoreductase, 2OG-Fe(II) oxygenase family protein                                                                                                                                                                            |
| Afu5g01005 | Chr5_A_fumigatus_Af293:257,649..265,835(+) | Ortholog of Neosartorya fischeri NRRL 181 : NFIA_041190 and Aspergillus fumigatus A1163 : AFUB_049450                                                                                                                                   |
| Afu5g01010 | Chr5_A_fumigatus_Af293:261,795..262,839(+) | Ortholog of A. fumigatus Af293 : Afu8g00342, A. niger CBS 513.88 : An11g08170, Neosartorya fischeri NRRL 181 : NFIA_041160, NFIA_057730 and Aspergillus fumigatus A1163 : AFUB_049470, AFUB_086230                                      |
| Afu5g01020 | Chr5_A_fumigatus_Af293:263,220..264,401(+) | Ortholog(s) have N-terminal protein N-methyltransferase activity, role in N-terminal peptidyl-proline dimethylation, cytoplasmic translation, single-species biofilm formation on inanimate substrate and cytosol, nucleus localization |
| Afu5g01030 | Chr5_A_fumigatus_Af293:266,294..270,326(-) | Putative glyceraldehyde 3-phosphate dehydrogenase                                                                                                                                                                                       |
| Afu5g01040 | Chr5_A_fumigatus_Af293:271,173..271,976(+) | Ortholog(s) have versicolorin reductase activity and role in monodictyphenone biosynthetic process, sterigmatocystin biosynthetic process, xanthone-containing compound biosynthetic process                                            |
| Afu5g01050 | Chr5_A_fumigatus_Af293:273,337..274,032(+) | Ortholog of Aspergillus fumigatus A1163 : AFUB_049530                                                                                                                                                                                   |
| Afu5g01065 | Chr5_A_fumigatus_Af293:274,190..276,403(-) | Has domain(s) with predicted DNA binding, RNA polymerase II transcription factor activity, sequence-specific DNA binding, zinc ion binding activity and role in regulation of transcription, DNA-templated transcription, DNA-templated |
| Afu5g01080 | Chr5_A_fumigatus_Af293:276,701..278,495(-) | Has domain(s) with predicted substrate-specific transmembrane transporter activity, transmembrane transporter activity, role in transmembrane transport and integral component of membrane, membrane localization                       |
| Afu5g01090 | Chr5_A_fumigatus_Af293:279,017..280,663(+) | Has domain(s) with predicted ATP binding, phosphotransferase activity, alcohol group as acceptor activity and role in amino sugar metabolic process, peptidoglycan turnover                                                             |
| Afu5g01100 | Chr5_A_fumigatus_Af293:281,249..282,903(+) | Ortholog of A. nidulans FGSC A4 : AN5259, A. fumigatus Af293 : Afu4g14660, A. niger CBS 513.88 : An16g07020, An02g11280 and Aspergillus wentii : Aspwe1_0055325, Aspwe1_0172784                                                         |
| Afu5g01110 | Chr5_A_fumigatus_Af293:282,982..283,083(-) | Ortholog of Aspergillus fumigatus A1163 : AFUB_049590                                                                                                                                                                                   |
| Afu5g01120 | Chr5_A_fumigatus_Af293:284,067..285,428(+) | Ortholog of A. nidulans FGSC A4 : AN8927, A. oryzae RIB40 : AO090003001298, Aspergillus flavus NRRL 3357 : AFL2T_01773 and Neosartorya fischeri NRRL 181 : NFIA_041050                                                                  |
| Afu5g01130 | Chr5_A_fumigatus_Af293:286,431..287,116(+) | Ortholog of Aspergillus fumigatus A1163 : AFUB_049610                                                                                                                                                                                   |
| Afu5g01140 | Chr5_A_fumigatus_Af293:287,223..288,526(-) | Ortholog(s) have plasma membrane localization                                                                                                                                                                                           |
| Afu5g01160 | Chr5_A_fumigatus_Af293:289,997..293,024(-) | Ortholog(s) have role in cellular response to drug and plasma membrane localization                                                                                                                                                     |
| Afu5g01170 | Chr5_A_fumigatus_Af293:293,165..293,906(-) | Ortholog(s) have role in ethanol metabolic process and mitochondrial inner membrane localization                                                                                                                                        |
| Afu5g01180 | Chr5_A_fumigatus_Af293:294,359..295,991(-) | Has domain(s) with predicted GTP binding, GTPase activity and role in intracellular protein transport, nucleocytoplasmic transport, protein transport, signal transduction, small GTPase mediated signal transduction                   |
| Afu5g01190 | Chr5_A_fumigatus_Af293:296,877..299,567(-) | Ortholog(s) have alpha-L-fucosidase activity and role in xyloglucan metabolic process                                                                                                                                                   |
| Afu5g01200 | Chr5_A_fumigatus_Af293:299,899..301,571(-) | Putative carboxypeptidase S1                                                                                                                                                                                                            |
| Afu5g01210 | Chr5_A_fumigatus_Af293:302,633..304,030(-) | Ortholog(s) have extracellular region localization                                                                                                                                                                                      |
| Afu5g01220 | Chr5_A_fumigatus_Af293:305,420..306,622(+) | Ortholog of Aspergillus wentii : Aspwe1_0024711 and Aspergillus fumigatus A1163 : AFUB_049690                                                                                                                                           |
| Afu5g01230 | Chr5_A_fumigatus_Af293:308,561..309,772(+) | RTA1 domain protein                                                                                                                                                                                                                     |
| Afu5g01240 | Chr5_A_fumigatus_Af293:310,446..312,371(+) | Has domain(s) with predicted carbon-nitrogen ligase activity, with glutamine as amido-N-donor activity                                                                                                                                  |
| Afu5g01242 | Chr5_A_fumigatus_Af293:312,721..313,499(+) | Ortholog of Aspergillus fumigatus A1163 : AFUB_049720                                                                                                                                                                                   |
| Afu5g01245 | Chr5_A_fumigatus_Af293:314,943..315,998(+) | Ortholog(s) have cytosol, nucleus localization                                                                                                                                                                                          |
| Afu5g01248 | Chr5_A_fumigatus_Af293:316,147..317,731(+) | Ortholog of Aspergillus fumigatus A1163 : AFUB_049740                                                                                                                                                                                   |
| Afu5g01250 | Chr5_A_fumigatus_Af293:318,205..319,062(+) | Has domain(s) with predicted coenzyme binding, oxidoreductase activity, acting on the CH-OH group of donors, NAD or NADP as acceptor, phosphogluconate dehydrogenase (decarboxylating) activity                                         |
| Afu5g01260 | Chr5_A_fumigatus_Af293:319,339..320,223(-) | Ortholog of A. oryzae RIB40 : AO090138000080, Aspergillus flavus NRRL 3357 : AFL2T_08758, Neosartorya fischeri NRRL 181 : NFIA_040860 and Aspergillus fumigatus A1163 : AFUB_049760                                                     |
| Afu5g01272 | Chr5_A_fumigatus_Af293:322,314..324,173(+) | Has domain(s) with predicted DNA binding, RNA polymerase II transcription factor activity, sequence-specific DNA binding, zinc ion binding activity and role in regulation of transcription, DNA-templated transcription, DNA-templated |
| Afu5g01290 | Chr5_A_fumigatus_Af293:324,670..325,785(+) | Putative zinc-binding oxidoreductase                                                                                                                                                                                                    |
| Afu5g01300 | Chr5_A_fumigatus_Af293:326,045..327,838(-) | Ortholog of Neosartorya fischeri NRRL 181 : NFIA_040820, Aspergillus fumigatus A1163 : AFUB_049800 and Aspergillus clavatus NRRL 1 : ACLA_003970                                                                                        |
| Afu5g01310 | Chr5_A_fumigatus_Af293:329,185..330,744(-) | Has domain(s) with predicted role in response to stress and integral component of membrane localization                                                                                                                                 |
| Afu5g01320 | Chr5_A_fumigatus_Af293:331,691..333,834(-) | Has domain(s) with predicted transmembrane transporter activity, role in transmembrane transport and integral component of membrane localization                                                                                        |
| Afu5g01330 | Chr5_A_fumigatus_Af293:337,231..340,082(+) | Has domain(s) with predicted acid phosphatase activity, hydrolase activity, metal ion binding activity                                                                                                                                  |
| Afu5g01340 | Chr5_A_fumigatus_Af293:340,208..342,310(-) | Putative phospholipase B                                                                                                                                                                                                                |
| Afu5g01350 | Chr5_A_fumigatus_Af293:342,938..345,341(-) | Has domain(s) with predicted role in transmembrane transport and integral component of membrane localization                                                                                                                            |
| Afu5g01360 | Chr5_A_fumigatus_Af293:345,827..351,157(+) | Ortholog(s) have oxidoreductase activity and role in steroid metabolic process                                                                                                                                                          |
| Afu5g01370 | Chr5_A_fumigatus_Af293:351,293..352,418(-) | Ortholog of A. nidulans FGSC A4 : AN3630, Neosartorya fischeri NRRL 181 : NFIA_040730, Aspergillus versicolor : Aspve1_0032027 and Aspergillus fumigatus A1163 : AFUB_049880                                                            |
| Afu5g01380 | Chr5_A_fumigatus_Af293:353,043..354,167(+) | Transcript up-regulated in conidia exposed to neutrophils                                                                                                                                                                               |
| Afu5g01410 | Chr5_A_fumigatus_Af293:369,915..373,565(+) | Has domain(s) with predicted ATP binding activity                                                                                                                                                                                       |
| Afu5g01420 | Chr5_A_fumigatus_Af293:373,849..374,613(-) | Ortholog(s) have extracellular region localization                                                                                                                                                                                      |
| Afu5g01430 | Chr5_A_fumigatus_Af293:375,182..376,001(-) | ThiJ/PfpI family protein                                                                                                                                                                                                                |
| Afu5g01440 | Chr5_A_fumigatus_Af293:376,504..377,687(-) | Ortholog(s) have thioredoxin peroxidase activity, role in cell redox homeostasis, cellular response to oxidative stress, response to metal ion and peroxisome, plasma membrane localization                                             |
| Afu5g01450 | Chr5_A_fumigatus_Af293:377,840..379,168(-) | Putative NADH-dependent flavin oxidoreductase                                                                                                                                                                                           |
| Afu5g01460 | Chr5_A_fumigatus_Af293:379,479..381,009(-) | Has domain(s) with predicted RNA polymerase II transcription factor activity, sequence-specific DNA binding, zinc ion binding activity, role in regulation of transcription, DNA-templated and nucleus localization                     |



|            |                                            |                                                                                                                                                                                                                                                 |
|------------|--------------------------------------------|-------------------------------------------------------------------------------------------------------------------------------------------------------------------------------------------------------------------------------------------------|
| Afu5g01470 | Chr5_A_fumigatus_Af293:381,384..383,369(-) | Has domain(s) with predicted copper ion binding, primary amine oxidase activity, quinone binding activity and role in amine metabolic process, oxidation-reduction process                                                                      |
| Afu5g01480 | Chr5_A_fumigatus_Af293:383,966..385,567(+) | Ortholog of A. nidulans FGSC A4 : AN10795, AN6721, A. fumigatus Af293 : Afu2g13300, A. niger CBS 513.88 : An16g00890 and A. oryzae RIB40 : AO090011000070, AO090026000292                                                                       |
| Afu5g01490 | Chr5_A_fumigatus_Af293:386,888..388,165(-) | Putative hydrophobin                                                                                                                                                                                                                            |
| Afu5g01500 | Chr5_A_fumigatus_Af293:388,348..389,425(+) | Homocysteine S-methyltransferase activity, role in L-methionine biosynthetic process from S-adenosylmethionine                                                                                                                                  |
| Afu5g01510 | Chr5_A_fumigatus_Af293:389,543..391,289(-) | Ortholog(s) have L-proline transmembrane transporter activity, role in proline transport and fungal-type vacuole, plasma membrane localization                                                                                                  |
| Afu5g01520 | Chr5_A_fumigatus_Af293:392,241..394,144(+) | Major facilitator superfamily protein                                                                                                                                                                                                           |
| Afu5g01530 | Chr5_A_fumigatus_Af293:395,030..396,105(-) | Has domain(s) with predicted oxidoreductase activity and role in metabolic process                                                                                                                                                              |
| Afu5g01540 | Chr5_A_fumigatus_Af293:396,854..399,036(+) | Has domain(s) with predicted role in transmembrane transport and integral component of membrane localization                                                                                                                                    |
| Afu5g01550 | Chr5_A_fumigatus_Af293:399,752..402,216(+) | Ortholog(s) have role in hyphal growth, regulation of glycogen metabolic process                                                                                                                                                                |
| Afu5g01560 | Chr5_A_fumigatus_Af293:402,386..402,604(-) | Ortholog of Aspergillus fumigatus A1163 : AFUB_050100                                                                                                                                                                                           |
| Afu5g01570 | Chr5_A_fumigatus_Af293:402,779..403,792(-) | Ortholog of A. oryzae RIB40 : AO090011000267, Aspergillus glaucus : Aspgl1_0129601, Aspergillus flavus NRRL 3357 : AFL2T_05058 and Neosartorya fischeri NRRL 181 : NFIA_040510                                                                  |
| Afu5g01580 | Chr5_A_fumigatus_Af293:404,744..407,694(-) | Has domain(s) with predicted oxidoreductase activity and role in metabolic process                                                                                                                                                              |
| Afu5g01590 | Chr5_A_fumigatus_Af293:407,927..409,582(+) | Has domain(s) with predicted role in isoprenoid biosynthetic process                                                                                                                                                                            |
| Afu5g01600 | Chr5_A_fumigatus_Af293:409,993..411,503(+) | Has domain(s) with predicted DNA binding, DNA-directed DNA polymerase activity, catalytic activity and role in DNA replication                                                                                                                  |
| Afu5g01610 | Chr5_A_fumigatus_Af293:411,933..412,139(-) | Ortholog of Aspergillus fumigatus A1163 : AFUB_050150                                                                                                                                                                                           |
| Afu5g01620 | Chr5_A_fumigatus_Af293:412,960..413,808(+) | Predicted adhesin-like protein                                                                                                                                                                                                                  |
| Afu5g01630 | Chr5_A_fumigatus_Af293:414,816..416,800(+) | Ortholog(s) have drug transmembrane transporter activity and role in cellular response to biotic stimulus, drug transmembrane transport, fluconazole transport, peptide transport, spermidine transport                                         |
| Afu5g01640 | Chr5_A_fumigatus_Af293:417,463..418,617(+) | Ortholog of Neosartorya fischeri NRRL 181 : NFIA_040440, Aspergillus fumigatus A1163 : AFUB_050180 and Aspergillus clavatus NRRL 1 : ACLA_003640                                                                                                |
| Afu5g01650 | Chr5_A_fumigatus_Af293:420,067..420,861(+) | Has domain(s) with predicted sequence-specific DNA binding, transcription factor activity, sequence-specific DNA binding activity and role in regulation of transcription, DNA-templated                                                        |
| Afu5g01662 | Chr5_A_fumigatus_Af293:421,501..423,816(+) | Has domain(s) with predicted DNA binding, zinc ion binding activity, role in transcription, DNA-templated and nucleus localization                                                                                                              |
| Afu5g01680 | Chr5_A_fumigatus_Af293:423,967..425,737(-) | Ortholog(s) have endoplasmic reticulum localization                                                                                                                                                                                             |
| Afu5g01690 | Chr5_A_fumigatus_Af293:426,111..427,078(+) | Ortholog(s) have cytosol, nucleus localization                                                                                                                                                                                                  |
| Afu5g01700 | Chr5_A_fumigatus_Af293:427,157..429,333(-) | Has domain(s) with predicted DNA binding, RNA polymerase II transcription factor activity, sequence-specific DNA binding, zinc ion binding activity and role in regulation of transcription, DNA-templated, transcription, DNA-templated        |
| Afu5g01710 | Chr5_A_fumigatus_Af293:429,669..431,519(-) | Cytochrome P450 phenylacetate 2-hydroxylase                                                                                                                                                                                                     |
| Afu5g01720 | Chr5_A_fumigatus_Af293:432,838..433,223(+) | Ortholog of Aspergillus fumigatus A1163 : AFUB_050250                                                                                                                                                                                           |
| Afu5g01730 | Chr5_A_fumigatus_Af293:433,406..440,939(-) | Has domain(s) with predicted DNA binding, chromatin binding activity                                                                                                                                                                            |
| Afu5g01740 | Chr5_A_fumigatus_Af293:441,049..443,125(+) | Putative deoxyhypusine synthase                                                                                                                                                                                                                 |
| Afu5g01750 | Chr5_A_fumigatus_Af293:443,187..448,026(+) | Has domain(s) with predicted ubiquitinyl hydrolase activity, zinc ion binding activity and role in protein deubiquitination, ubiquitin-dependent protein catabolic process                                                                      |
| Afu5g01760 | Chr5_A_fumigatus_Af293:448,246..450,547(-) | Ortholog(s) have rRNA (cytosine-C5-)-methyltransferase activity and role in assembly of large subunit precursor of preribosome, maturation of LSU-rRNA from tritricornic rRNA transcript (SSU-rRNA, 5.8S rRNA, LSU-rRNA), rRNA base methylation |
| Afu5g01770 | Chr5_A_fumigatus_Af293:450,687..451,812(+) | Ortholog of A. nidulans FGSC A4 : AN8072, A. oryzae RIB40 : AO090003001347, Aspergillus wentii : Aspwe1_0029886, Aspergillus sydowii : Aspsy1_0156406 and Aspergillus terreus NIH2624 : ATET_09794                                              |
| Afu5g01780 | Chr5_A_fumigatus_Af293:452,401..455,057(-) | Ortholog(s) have role in ascospore formation, conidium formation, hyphal growth, regulation of ascospore formation, regulation of meiosis I and regulation of mitotic nuclear division, more                                                    |
| Afu5g01790 | Chr5_A_fumigatus_Af293:455,314..455,541(-) | Predicted adhesin-like protein                                                                                                                                                                                                                  |
| Afu5g01800 | Chr5_A_fumigatus_Af293:455,698..456,944(-) | DNA repair protein                                                                                                                                                                                                                              |
| Afu5g01810 | Chr5_A_fumigatus_Af293:457,314..458,468(-) | Ortholog(s) have role in GPI anchor biosynthetic process                                                                                                                                                                                        |
| Afu5g01820 | Chr5_A_fumigatus_Af293:458,980..463,583(+) | Ortholog(s) have role in Golgi to plasma membrane transport and fungal-type vacuole membrane localization                                                                                                                                       |
| Afu5g01830 | Chr5_A_fumigatus_Af293:463,789..466,012(-) | Has domain(s) with predicted catalytic activity, hydrolase activity, hydrolyzing O-glycosyl compounds activity and role in carbohydrate metabolic process                                                                                       |
| Afu5g01840 | Chr5_A_fumigatus_Af293:466,591..470,453(-) | protein of unknown function                                                                                                                                                                                                                     |
| Afu5g01850 | Chr5_A_fumigatus_Af293:470,727..472,720(+) | Ortholog(s) have tRNA (adenine-N1-)-methyltransferase activity, role in tRNA methylation and nucleus, tRNA (m1A) methyltransferase complex localization                                                                                         |
| Afu5g01860 | Chr5_A_fumigatus_Af293:473,076..474,216(-) | Ortholog(s) have role in Arp2/3 complex-mediated actin nucleation, actin cortical patch localization, cellular response to drug, endocytosis and establishment of mitochondrion localization, more                                              |
| Afu5g01870 | Chr5_A_fumigatus_Af293:474,270..476,459(+) | Ortholog(s) have ATPase activity, DNA clamp loader activity and role in UV-damage excision repair, leading strand elongation, mitotic DNA damage checkpoint, sister chromatid cohesion                                                          |
| Afu5g01880 | Chr5_A_fumigatus_Af293:476,542..478,803(+) | Has domain(s) with predicted acid phosphatase activity                                                                                                                                                                                          |
| Afu5g01890 | Chr5_A_fumigatus_Af293:479,256..481,637(+) | Putative peptidyl-prolyl cis-trans isomerase                                                                                                                                                                                                    |
| Afu5g01900 | Chr5_A_fumigatus_Af293:482,209..485,134(-) | transcription factor                                                                                                                                                                                                                            |
| Afu5g01910 | Chr5_A_fumigatus_Af293:485,997..487,013(-) | Ortholog of A. nidulans FGSC A4 : AN8036, A. niger CBS 513.88 : An16g01770, A. oryzae RIB40 : AO090003001328, Aspergillus wentii : Aspwe1_0042781 and Aspergillus sydowii : Aspsy1_0047861                                                      |
| Afu5g01920 | Chr5_A_fumigatus_Af293:487,906..489,695(+) | Ortholog of A. niger CBS 513.88 : An16g01780, A. oryzae RIB40 : AO090003001326, Aspergillus wentii : Aspwe1_0174201, Aspergillus sydowii : Aspsy1_0029040 and Aspergillus terreus NIH2624 : ATET_09813                                          |
| Afu5g01930 | Chr5_A_fumigatus_Af293:489,700..491,868(-) | protein of unknown function                                                                                                                                                                                                                     |
| Afu5g01940 | Chr5_A_fumigatus_Af293:493,699..498,757(+) | Has domain(s) with predicted nucleic acid binding, nucleotide binding activity                                                                                                                                                                  |
| Afu5g01950 | Chr5_A_fumigatus_Af293:498,909..500,329(-) | Ortholog(s) have chromatin binding activity                                                                                                                                                                                                     |
| Afu5g01960 | Chr5_A_fumigatus_Af293:501,133..503,280(+) | Ortholog(s) have role in phosphate ion transport, protein maturation and endoplasmic reticulum, mitochondrion, plasma membrane localization                                                                                                     |
| Afu5g01970 | Chr5_A_fumigatus_Af293:503,797..505,194(+) | glyceraldehyde-3-phosphate dehydrogenase                                                                                                                                                                                                        |
| Afu5g01980 | Chr5_A_fumigatus_Af293:505,597..510,023(+) | Major class 2 histone deacetylase                                                                                                                                                                                                               |
| Afu5g01990 | Chr5_A_fumigatus_Af293:511,005..511,475(+) | BYS1 domain protein                                                                                                                                                                                                                             |
| Afu5g02000 | Chr5_A_fumigatus_Af293:511,853..514,101(-) | Has domain(s) with predicted proline racemase activity                                                                                                                                                                                          |
| Afu5g02010 | Chr5_A_fumigatus_Af293:514,172..518,381(+) | Ortholog(s) have metalloendopeptidase activity                                                                                                                                                                                                  |
| Afu5g02020 | Chr5_A_fumigatus_Af293:519,080..520,101(+) | Putative aldehyde reductase                                                                                                                                                                                                                     |
| Afu5g02030 | Chr5_A_fumigatus_Af293:520,484..521,754(+) | Has domain(s) with predicted mRNA binding activity, role in mRNA polyadenylation and mRNA cleavage factor complex localization                                                                                                                  |
| Afu5g02040 | Chr5_A_fumigatus_Af293:522,625..524,528(+) | Putative extracellular lipase                                                                                                                                                                                                                   |
| Afu5g02050 | Chr5_A_fumigatus_Af293:524,906..526,068(+) | Ortholog of A. nidulans FGSC A4 : AN11033, A. niger CBS 513.88 : An16g01890, A. oryzae RIB40 : AO090003001318, Aspergillus wentii : Aspwe1_0116157 and Aspergillus sydowii : Aspsy1_0207101                                                     |
| Afu5g02060 | Chr5_A_fumigatus_Af293:526,816..527,634(+) | Ortholog(s) have role in coenzyme A biosynthetic process and CoA-synthesizing protein complex, endoplasmic reticulum, lipid particle, mitochondrion, nuclear envelope localization                                                              |
| Afu5g02070 | Chr5_A_fumigatus_Af293:528,782..529,693(-) | Ortholog of A. nidulans FGSC A4 : AN8048, A. niger CBS 513.88 : An02g11210, A. oryzae RIB40 : AO090003001314, Aspergillus wentii : Aspwe1_0174218 and Aspergillus sydowii : Aspsy1_0155996                                                      |
| Afu5g02080 | Chr5_A_fumigatus_Af293:529,805..530,664(+) | NADH-ubiquinone oxidoreductase with a role in oxidative phosphorylation                                                                                                                                                                         |
| Afu5g02090 | Chr5_A_fumigatus_Af293:531,007..531,795(-) | Ortholog(s) have cytosol, nucleus localization                                                                                                                                                                                                  |
| Afu5g02100 | Chr5_A_fumigatus_Af293:531,844..532,916(-) | Secreted protein of unknown function                                                                                                                                                                                                            |
| Afu5g02110 | Chr5_A_fumigatus_Af293:533,545..535,070(-) | Has domain(s) with predicted carbon-sulfur lyase activity and role in metabolic process                                                                                                                                                         |
| Afu5g02120 | Chr5_A_fumigatus_Af293:535,310..538,537(+) | Ortholog of A. nidulans FGSC A4 : AN8051, A. niger CBS 513.88 : An02g11160, A. oryzae RIB40 : AO090003001306, Aspergillus wentii : Aspwe1_0029924 and Aspergillus sydowii : Aspsy1_0156226                                                      |

|            |                                            |                                                                                                                                                                                                                                                |
|------------|--------------------------------------------|------------------------------------------------------------------------------------------------------------------------------------------------------------------------------------------------------------------------------------------------|
| Afu5g02130 | Chr5_A_fumigatus_Af293:539,272..541,673(-) | Putative alpha-galactosidase                                                                                                                                                                                                                   |
| Afu5g02140 | Chr5_A_fumigatus_Af293:541,877..547,180(-) | Putative inositol polyphosphate phosphatase                                                                                                                                                                                                    |
| Afu5g02150 | Chr5_A_fumigatus_Af293:547,635..548,545(-) | Putative proteasome component                                                                                                                                                                                                                  |
| Afu5g02160 | Chr5_A_fumigatus_Af293:548,997..552,615(-) | Ortholog(s) have nucleolus localization                                                                                                                                                                                                        |
| Afu5g02170 | Chr5_A_fumigatus_Af293:554,444..558,690(+) | Ortholog(s) have ATPase activity, DNA/DNA annealing activity, role in mitotic chromosome condensation and cytosol, nuclear condensin complex localization                                                                                      |
| Afu5g02180 | Chr5_A_fumigatus_Af293:559,007..560,286(+) | Cysteine synthase (o-acetylserine (thiol)-lyase)                                                                                                                                                                                               |
| Afu5g02190 | Chr5_A_fumigatus_Af293:560,398..561,745(-) | Has domain(s) with predicted electron carrier activity, metal ion binding, molybdenum ion binding, oxidoreductase activity and role in nitrate assimilation, oxidation-reduction process                                                       |
| Afu5g02200 | Chr5_A_fumigatus_Af293:561,979..563,147(-) | Ortholog(s) have mitochondrion targeting sequence binding, protein channel activity, role in protein import into mitochondrial inner membrane and mitochondrial inner membrane localization                                                    |
| Afu5g02210 | Chr5_A_fumigatus_Af293:563,258..565,725(-) | Ortholog of A. nidulans FGSC A4 : AN8034, A. niger CBS 513.88 : An02g10730, A. oryzae RIB40 : AO090102000294, Aspergillus wentii : Aspwe1_0114775 and Aspergillus sydowii : Aspsy1_0033693                                                     |
| Afu5g02220 | Chr5_A_fumigatus_Af293:566,033..569,100(-) | Ortholog(s) have role in ascospore formation, conidiophore development, conidium formation, hyphal growth, regulation of protein localization to mitotic spindle pole body and septation initiation signaling, more                            |
| Afu5g02230 | Chr5_A_fumigatus_Af293:569,279..571,748(-) | Putative actin interacting protein                                                                                                                                                                                                             |
| Afu5g02240 | Chr5_A_fumigatus_Af293:571,955..573,035(+) | NAD dependent epimerase/dehydratase family protein                                                                                                                                                                                             |
| Afu5g02250 | Chr5_A_fumigatus_Af293:574,480..577,620(+) | Ortholog of A. nidulans FGSC A4 : AN8031, A. niger CBS 513.88 : An02g10580, A. oryzae RIB40 : AO090102000288, Aspergillus wentii : Aspwe1_0042830 and Aspergillus sydowii : Aspsy1_0156829                                                     |
| Afu5g02260 | Chr5_A_fumigatus_Af293:577,630..582,809(+) | Putative ABC multidrug transporter                                                                                                                                                                                                             |
| Afu5g02270 | Chr5_A_fumigatus_Af293:583,247..585,836(+) | Fungal specific transcription factor domain family protein                                                                                                                                                                                     |
| Afu5g02280 | Chr5_A_fumigatus_Af293:586,719..588,210(-) | Has domain(s) with predicted hydrolase activity, hydrolyzing O-glycosyl compounds activity and role in carbohydrate metabolic process                                                                                                          |
| Afu5g02290 | Chr5_A_fumigatus_Af293:589,449..592,756(-) | Ortholog(s) have chloride transmembrane transporter activity, potassium uptake transmembrane transporter activity                                                                                                                              |
| Afu5g02300 | Chr5_A_fumigatus_Af293:593,925..595,013(-) | Has domain(s) with predicted peroxidase activity                                                                                                                                                                                               |
| Afu5g02310 | Chr5_A_fumigatus_Af293:595,247..596,570(-) | Ortholog of A. nidulans FGSC A4 : AN8028, A. niger CBS 513.88 : An02g10470, A. oryzae RIB40 : AO090102000345, Aspergillus sydowii : Aspsy1_0059896 and Aspergillus terreus NIH2624 : ATET_09200                                                |
| Afu5g02320 | Chr5_A_fumigatus_Af293:596,583..597,904(-) | Secreted protein of unknown function                                                                                                                                                                                                           |
| Afu5g02330 | Chr5_A_fumigatus_Af293:598,210..599,272(+) | Allergen Asp f1                                                                                                                                                                                                                                |
| Afu5g02340 | Chr5_A_fumigatus_Af293:600,037..603,026(+) | Ortholog of A. nidulans FGSC A4 : AN8027, A. niger CBS 513.88 : An09g03700, Neosartorya fischeri NRRL 181 : NFIA_039750, Aspergillus versicolor : Aspve1_0154183 and Aspergillus zonatus : Aspzo1_0013765                                      |
| Afu5g02350 | Chr5_A_fumigatus_Af293:603,109..604,368(+) | Putative carbon-nitrogen family hydrolase                                                                                                                                                                                                      |
| Afu5g02360 | Chr5_A_fumigatus_Af293:605,751..609,032(-) | Ortholog(s) have role in hyphal growth, peroxisome organization, vacuole organization and Golgi apparatus localization                                                                                                                         |
| Afu5g02370 | Chr5_A_fumigatus_Af293:609,205..611,860(-) | Vacuolar ATP synthase catalytic subunit A                                                                                                                                                                                                      |
| Afu5g02380 | Chr5_A_fumigatus_Af293:612,705..614,436(+) | Ortholog of A. nidulans FGSC A4 : AN8020, AN0195, A. niger CBS 513.88 : An03g04900, An02g10420, A. oryzae RIB40 : AO090001000067, AO090102000350 and Aspergillus wentii : Aspwe1_0114436, Aspwe1_0176498                                       |
| Afu5g02390 | Chr5_A_fumigatus_Af293:614,621..617,783(+) | Has domain(s) with predicted role in transmembrane transport and integral component of membrane localization                                                                                                                                   |
| Afu5g02400 | Chr5_A_fumigatus_Af293:617,914..620,924(+) | Ortholog(s) have cytosol, mitotic spindle pole body, nucleus localization                                                                                                                                                                      |
| Afu5g02410 | Chr5_A_fumigatus_Af293:621,886..623,486(-) | Putative DEAD/DEAH box helicase                                                                                                                                                                                                                |
| Afu5g02420 | Chr5_A_fumigatus_Af293:623,488..625,330(+) | Ortholog(s) have U2 snRNP, cytosol localization                                                                                                                                                                                                |
| Afu5g02430 | Chr5_A_fumigatus_Af293:625,685..628,600(+) | Has domain(s) with predicted ATP binding, DNA binding, DNA ligase (ATP) activity and role in DNA recombination, DNA repair                                                                                                                     |
| Afu5g02440 | Chr5_A_fumigatus_Af293:629,040..631,759(-) | Ortholog(s) have role in positive regulation of mitotic metaphase/anaphase transition and anaphase-promoting complex, mitotic spindle pole body localization                                                                                   |
| Afu5g02450 | Chr5_A_fumigatus_Af293:631,975..633,093(+) | Putative polyprenyl synthetase                                                                                                                                                                                                                 |
| Afu5g02460 | Chr5_A_fumigatus_Af293:634,677..636,602(+) | Ortholog of A. nidulans FGSC A4 : AN5465, A. niger CBS 513.88 : An02g10330, An07g05030, A. oryzae RIB40 : AO090102000359, Aspergillus wentii : Aspwe1_0114453 and Aspergillus sydowii : Aspsy1_0156722                                         |
| Afu5g02470 | Chr5_A_fumigatus_Af293:636,920..638,606(-) | Thiamine biosynthesis protein, PhoB-regulated                                                                                                                                                                                                  |
| Afu5g02480 | Chr5_A_fumigatus_Af293:639,550..641,874(-) | Putative glycogen synthase                                                                                                                                                                                                                     |
| Afu5g02490 | Chr5_A_fumigatus_Af293:643,973..644,968(-) | Has domain(s) with predicted oxidoreductase activity, transferase activity, transferring acyl groups other than amino-acyl groups, zinc ion binding activity and role in oxidation-reduction process                                           |
| Afu5g02500 | Chr5_A_fumigatus_Af293:645,430..646,082(+) | protein of unknown function                                                                                                                                                                                                                    |
| Afu5g02510 | Chr5_A_fumigatus_Af293:646,444..650,093(-) | Ortholog(s) have role in Golgi to vacuole transport, ascospore wall assembly, retrograde transport, endosome to Golgi and GARP complex, mitochondrion localization                                                                             |
| Afu5g02520 | Chr5_A_fumigatus_Af293:650,260..652,927(+) | Ortholog(s) have DNA replication origin binding, chromatin binding, single-stranded DNA binding, single-stranded DNA-dependent ATP-dependent DNA helicase activity                                                                             |
| Afu5g02530 | Chr5_A_fumigatus_Af293:653,089..654,944(+) | Has domain(s) with predicted ribokinase activity and role in D-ribose metabolic process                                                                                                                                                        |
| Afu5g02540 | Chr5_A_fumigatus_Af293:655,928..657,939(+) | Ortholog of A. nidulans FGSC A4 : AN7996, A. niger CBS 513.88 : An02g10230, A. oryzae RIB40 : AO090102000369, Aspergillus wentii : Aspwe1_0029974 and Aspergillus sydowii : Aspsy1_0156606                                                     |
| Afu5g02550 | Chr5_A_fumigatus_Af293:658,329..660,917(-) | Ortholog(s) have chromatin insulator sequence binding, transcription factor activity, core RNA polymerase III binding activity and role in transcription initiation from RNA polymerase III promoter                                           |
| Afu5g02560 | Chr5_A_fumigatus_Af293:661,646..665,087(+) | Ortholog(s) have protein phosphatase type 2A regulator activity                                                                                                                                                                                |
| Afu5g02570 | Chr5_A_fumigatus_Af293:665,117..677,364(+) | Ortholog(s) have histone acetyltransferase activity                                                                                                                                                                                            |
| Afu5g02580 | Chr5_A_fumigatus_Af293:677,833..678,957(+) | Ortholog(s) have U2-type spliceosomal complex, mitotic spindle pole body localization                                                                                                                                                          |
| Afu5g02590 | Chr5_A_fumigatus_Af293:679,022..682,214(+) | Ortholog(s) have role in positive regulation of mitotic metaphase/anaphase transition and anaphase-promoting complex, cytosol localization                                                                                                     |
| Afu5g02600 | Chr5_A_fumigatus_Af293:683,315..684,766(+) | Ortholog of A. nidulans FGSC A4 : AN8003, A. niger CBS 513.88 : An02g10100, Aspergillus wentii : Aspwe1_0174280, Aspergillus sydowii : Aspsy1_0033725 and Aspergillus terreus NIH2624 : ATET_09228                                             |
| Afu5g02610 | Chr5_A_fumigatus_Af293:685,654..687,128(+) | Has domain(s) with predicted electron carrier activity, heme binding, iron ion binding, oxidoreductase activity, acting on paired donors, with incorporation or reduction of molecular oxygen activity and role in oxidation-reduction process |
| Afu5g02620 | Chr5_A_fumigatus_Af293:687,330..689,013(-) | Ortholog(s) have oxidoreductase activity, oxygen binding activity and role in ascospore wall assembly, chlamydospore formation                                                                                                                 |
| Afu5g02630 | Chr5_A_fumigatus_Af293:689,239..689,978(+) | Ortholog of Neosartorya fischeri NRRL 181 : NFIA_039450, Aspergillus fumigatus A1163 : AFUB_051160, Aspergillus clavatus NRRL 1 : ACLA_002530 and Aspergillus terreus NIH2624 : ATET_09232                                                     |
| Afu5g02640 | Chr5_A_fumigatus_Af293:690,252..692,134(+) | Has domain(s) with predicted O-methyltransferase activity                                                                                                                                                                                      |
| Afu5g02650 | Chr5_A_fumigatus_Af293:692,297..693,109(-) | protein of unknown function                                                                                                                                                                                                                    |
| Afu5g02655 | Chr5_A_fumigatus_Af293:693,142..696,385(+) | Has domain(s) with predicted sequence-specific DNA binding, transcription factor activity, sequence-specific DNA binding activity and role in regulation of transcription, DNA-templated                                                       |
| Afu5g02660 | Chr5_A_fumigatus_Af293:696,501..699,185(-) | Has domain(s) with predicted oxidoreductase activity and role in oxidation-reduction process                                                                                                                                                   |
| Afu5g02670 | Chr5_A_fumigatus_Af293:700,135..700,845(-) | Ortholog of A. nidulans FGSC A4 : AN6760, AN8527, A. fumigatus Af293 : Afu4g01400, Afu5g14240, A. niger CBS 513.88 : An07g09050, An08g09630 and Aspergillus wentii : Aspwe1_0069899, Aspwe1_0185315, Aspwe1_0186212                            |
| Afu5g02690 | Chr5_A_fumigatus_Af293:702,770..705,415(+) | Ortholog(s) have role in conidiophore development                                                                                                                                                                                              |
| Afu5g02700 | Chr5_A_fumigatus_Af293:706,165..707,944(-) | Putative multidrug resistant protein                                                                                                                                                                                                           |
| Afu5g02710 | Chr5_A_fumigatus_Af293:708,150..708,374(+) | protein of unknown function                                                                                                                                                                                                                    |
| Afu5g02720 | Chr5_A_fumigatus_Af293:710,324..714,412(+) | Ortholog(s) have phosphoribosylformylglycinamide synthase activity, role in purine nucleotide biosynthetic process and Golgi apparatus localization                                                                                            |
| Afu5g02730 | Chr5_A_fumigatus_Af293:714,808..717,864(-) | Ortholog(s) have gamma-tubulin binding activity and spindle pole body localization                                                                                                                                                             |
| Afu5g02740 | Chr5_A_fumigatus_Af293:717,912..719,315(+) | Putative alpha-1,2-mannosyltransferase with a predicted role in N-linked protein glycosylation                                                                                                                                                 |
| Afu5g02750 | Chr5_A_fumigatus_Af293:719,993..720,857(-) | Cytochrome c oxidase subunit Va with a predicted role in oxidative phosphorylation                                                                                                                                                             |
| Afu5g02760 | Chr5_A_fumigatus_Af293:722,123..724,776(+) | Putative fatty acid elongase with a predicted role in fatty acid biosynthesis                                                                                                                                                                  |
| Afu5g02770 | Chr5_A_fumigatus_Af293:727,468..731,528(+) | Ortholog of A. nidulans FGSC A4 : AN8116, A. niger CBS 513.88 : An02g09830, A. oryzae RIB40 : AO090102000396, Aspergillus wentii : Aspwe1_0029998 and Aspergillus sydowii : Aspsy1_0050460                                                     |

Afu5g02780 Chr5\_A\_fumigatus\_Af293:732,988..737,296(+) Putative mitochondrial nicotinamide nucleotide transhydrogenase subunit  
 Afu5g02785 Chr5\_A\_fumigatus\_Af293:737,337..738,299(-) Ortholog of Neosartorya fischeri NRRL 181 : NFIA\_039310 and Aspergillus fumigatus A1163 : AFUB\_051320  
 Afu5g02790 Chr5\_A\_fumigatus\_Af293:739,720..742,121(+) Ortholog(s) have thiamine transmembrane transporter activity, role in thiamine transmembrane transport and endoplasmic reticulum, medial membrane band, plasma membrane of cell tip localization  
 Afu5g02800 Chr5\_A\_fumigatus\_Af293:742,624..744,489(-) C6 transcription factor  
 Afu5g02820 Chr5\_A\_fumigatus\_Af293:749,896..750,562(-) Ortholog of Aspergillus glaucus : Aspgl1\_0049726, Neosartorya fischeri NRRL 181 : NFIA\_039280, Aspergillus fumigatus A1163 : AFUB\_051350 and Aspergillus clavatus NRRL 1 : ACLA\_002340  
 Afu5g02840 Chr5\_A\_fumigatus\_Af293:750,813..753,776(-) Has domain(s) with predicted substrate-specific transmembrane transporter activity, transmembrane transporter activity, role in transmembrane transport and integral component of membrane, membrane localization  
 Afu5g02850 Chr5\_A\_fumigatus\_Af293:754,271..758,025(+) Has domain(s) with predicted arylformamidase activity and role in tryptophan catabolic process to kynurenine  
 Afu5g02860 Chr5\_A\_fumigatus\_Af293:758,332..760,220(+) Ortholog of A. nidulans FGSC A4 : AN2683, AN5069, A. fumigatus Af293 : Afu5g14320, A. niger CBS 513.88 : An09g04830, An14g05730 and A. oryzae RIB40 : AO090102000482, AO090001000197  
 Afu5g02870 Chr5\_A\_fumigatus\_Af293:760,729..762,034(+) Has domain(s) with predicted oxidoreductase activity and role in metabolic process  
 Afu5g02880 Chr5\_A\_fumigatus\_Af293:762,083..764,748(-) Ortholog(s) have nucleic acid binding transcription factor activity  
 Afu5g02890 Chr5\_A\_fumigatus\_Af293:764,921..767,461(-) Ortholog of A. nidulans FGSC A4 : AN8165, A. niger CBS 513.88 : An09g04870, A. oryzae RIB40 : AO090102000485 and Aspergillus wentii : Aspwe1\_0042540, Aspwe1\_0042989  
 Afu5g02900 Chr5\_A\_fumigatus\_Af293:769,794..770,829(+) Ortholog(s) have Golgi apparatus, cell septum, endoplasmic reticulum localization  
 Afu5g02910 Chr5\_A\_fumigatus\_Af293:770,881..772,556(-) NAP family protein  
 Afu5g02920 Chr5\_A\_fumigatus\_Af293:773,874..774,997(-) Ortholog(s) have NAD+ binding, sequence-specific DNA binding activity, role in nitrogen catabolite repression of transcription from RNA polymerase II promoter, regulation of nitrate assimilation and nucleus localization  
 Afu5g02930 Chr5\_A\_fumigatus\_Af293:778,620..780,409(-) Has domain(s) with predicted role in cellular amino acid metabolic process  
 Afu5g02940 Chr5\_A\_fumigatus\_Af293:781,599..783,300(-) Ortholog(s) have (R)-carnitine transmembrane transporter activity, choline transmembrane transporter activity, ethanolamine transmembrane transporter activity  
 Afu5g02950 Chr5\_A\_fumigatus\_Af293:786,805..790,619(+) Ortholog of A. nidulans FGSC A4 : AN8167, A. niger CBS 513.88 : An09g05040, A. oryzae RIB40 : AO090102000494, Aspergillus wentii : Aspwe1\_0030018 and Aspergillus sydowii : Aspsy1\_0061808  
 Afu5g02960 Chr5\_A\_fumigatus\_Af293:790,739..791,184(-) Ortholog of Aspergillus fumigatus A1163 : AFUB\_051480  
 Afu5g02970 Chr5\_A\_fumigatus\_Af293:792,199..794,897(-) Ortholog of A. nidulans FGSC A4 : AN12172, A. niger CBS 513.88 : An09g02540, A. oryzae RIB40 : AO090102000497, Aspergillus wentii : Aspwe1\_0114955 and Aspergillus sydowii : Aspsy1\_0161769  
 Afu5g02990 Chr5\_A\_fumigatus\_Af293:797,458..799,870(+) Putative aromatic amino acid aminotransferase  
 Afu5g03000 Chr5\_A\_fumigatus\_Af293:799,891..801,824(+) Ortholog(s) have actin monomer binding, protein kinase inhibitor activity, ribosome binding activity, role in negative regulation of protein phosphorylation and cytoplasm, nucleus, polysome, ribosome localization  
 Afu5g03010 Chr5\_A\_fumigatus\_Af293:803,554..806,502(+) protein of unknown function  
 Afu5g03020 Chr5\_A\_fumigatus\_Af293:806,575..808,149(+) 60S ribosomal protein L4  
 Afu5g03030 Chr5\_A\_fumigatus\_Af293:814,229..819,740(+) Has domain(s) with predicted DNA binding, RNA polymerase II transcription factor activity, sequence-specific DNA binding, zinc ion binding activity and role in regulation of transcription, DNA-templated, transcription, DNA-templated  
 Afu5g03040 Chr5\_A\_fumigatus\_Af293:820,242..823,363(+) Ortholog of A. nidulans FGSC A4 : AN8179, A. oryzae RIB40 : AO090102000505, Aspergillus wentii : Aspwe1\_0053028, Aspergillus sydowii : Aspsy1\_0050623 and Aspergillus terreus NIH2624 : ATET\_09281  
 Afu5g03050 Chr5\_A\_fumigatus\_Af293:823,511..827,029(+) Ortholog(s) have role in mRNA cis splicing, via spliceosome and Prp19 complex, mitotic spindle pole body, spliceosomal complex localization  
 Afu5g03060 Chr5\_A\_fumigatus\_Af293:828,603..830,127(+) Ortholog of A. nidulans FGSC A4 : AN8181, A. niger CBS 513.88 : An09g05240, A. oryzae RIB40 : AO090102000509, Aspergillus wentii : Aspwe1\_0053030 and Aspergillus sydowii : Aspsy1\_0050627

| GeneID     | Genomic Location (Gene)                        | Product Description                                                                                                                                                                                                  |
|------------|------------------------------------------------|----------------------------------------------------------------------------------------------------------------------------------------------------------------------------------------------------------------------|
| Afu5g12720 | Chr5_A_fumigatus_Af293:3,307,809..3,313,231(-) | Putative ABC multidrug transporter                                                                                                                                                                                   |
| Afu5g12730 | Chr5_A_fumigatus_Af293:3,314,537..3,340,664(+) | Nonribosomal peptide synthetase 8                                                                                                                                                                                    |
| Afu5g12740 | Chr5_A_fumigatus_Af293:3,340,680..3,343,467(+) | Putative MFS multidrug transporter                                                                                                                                                                                   |
| Afu5g12750 | Chr5_A_fumigatus_Af293:3,343,555..3,346,198(+) | hypothetical protein                                                                                                                                                                                                 |
| Afu5g12760 | Chr5_A_fumigatus_Af293:3,346,707..3,348,654(-) | CCCH zinc finger DNA binding protein                                                                                                                                                                                 |
| Afu5g12770 | Chr5_A_fumigatus_Af293:3,349,005..3,350,331(-) | metallo-beta-lactamase superfamily protein                                                                                                                                                                           |
| Afu5g12780 | Chr5_A_fumigatus_Af293:3,350,380..3,353,129(+) | hypothetical protein                                                                                                                                                                                                 |
| Afu5g12790 | Chr5_A_fumigatus_Af293:3,353,314..3,355,167(+) | mitochondrial 3-hydroxyisobutyryl-CoA hydrolase, putative                                                                                                                                                            |
| Afu5g12800 | Chr5_A_fumigatus_Af293:3,355,297..3,356,439(-) | Ortholog(s) have structural constituent of ribosome activity and mitochondrial large ribosomal subunit localization                                                                                                  |
| Afu5g12810 | Chr5_A_fumigatus_Af293:3,356,560..3,357,895(+) | Ortholog(s) have structural constituent of ribosome activity and mitochondrial large ribosomal subunit localization                                                                                                  |
| Afu5g12820 | Chr5_A_fumigatus_Af293:3,358,074..3,358,750(-) | Ortholog(s) have endopeptidase activity, role in protein processing involved in protein targeting to mitochondrion and mitochondrial inner membrane peptidase complex localization                                   |
| Afu5g12830 | Chr5_A_fumigatus_Af293:3,358,866..3,360,837(-) | Ortholog of A. nidulans FGSC A4 : AN7959, A. oryzae RIB40 : A0090120000409, Neosartorya fischeri NRRL 181 : NFIA_074340, Aspergillus wentii : Aspwe1_0449236 and Aspergillus versicolor : Aspve1_0175438             |
| Afu5g12840 | Chr5_A_fumigatus_Af293:3,361,748..3,362,965(+) | Putative hydroxycyglutathione hydrolase                                                                                                                                                                              |
| Afu5g12850 | Chr5_A_fumigatus_Af293:3,363,320..3,364,625(+) | Ortholog of A. nidulans FGSC A4 : AN6822, A. niger CBS 513.88 : An14g06350, A. oryzae RIB40 : A0090120000405, Neosartorya fischeri NRRL 181 : NFIA_074310 and Aspergillus wentii : Aspwe1_0026733                    |
| Afu5g12860 | Chr5_A_fumigatus_Af293:3,365,321..3,367,316(+) | Ortholog of A. nidulans FGSC A4 : AN6823, A. niger CBS 513.88 : An14g06360, A. oryzae RIB40 : A0090120000406, Aspergillus wentii : Aspwe1_0039015 and Aspergillus sydowii : Aspsy1_0142898                           |
| Afu5g12870 | Chr5_A_fumigatus_Af293:3,375,118..3,377,520(+) | Ortholog(s) have cytosol, nucleus localization                                                                                                                                                                       |
| Afu5g12880 | Chr5_A_fumigatus_Af293:3,378,475..3,379,503(+) | Ortholog(s) have Rab guanyl-nucleotide exchange factor activity, role in ER to Golgi vesicle-mediated transport and TRAPP II protein complex, cytosol, nuclear envelope localization                                 |
| Afu5g12890 | Chr5_A_fumigatus_Af293:3,379,940..3,381,478(-) | Ortholog of A. nidulans FGSC A4 : AN6826, A. niger CBS 513.88 : An14g06450, A. oryzae RIB40 : A0090120000402, Aspergillus wentii : Aspwe1_0058891 and Aspergillus sydowii : Aspsy1_0143996                           |
| Afu5g12895 | Chr5_A_fumigatus_Af293:3,381,871..3,382,377(+) | Ortholog(s) have role in posttranscriptional gene silencing, production of small RNA involved in gene silencing by RNA                                                                                               |
| Afu5g12900 | Chr5_A_fumigatus_Af293:3,383,154..3,386,795(+) | Has domain(s) with predicted sequence-specific DNA binding, transcription factor activity, sequence-specific DNA binding, zinc ion binding activity and role in regulation of transcription, DNA-templated           |
| Afu5g12910 | Chr5_A_fumigatus_Af293:3,387,547..3,389,130(+) | Ortholog(s) have role in mRNA splicing, via spliceosome and Prp19 complex, U1 snRNP, U2 snRNP, U2-type prespliceosome, U4/U6 x U5 tri-snRNP complex, U5 snRNP localization                                           |
| Afu5g12920 | Chr5_A_fumigatus_Af293:3,389,488..3,391,310(+) | Putative iron-regulated transporter                                                                                                                                                                                  |
| Afu5g12930 | Chr5_A_fumigatus_Af293:3,391,693..3,393,741(+) | Has domain(s) with predicted RNA polymerase II transcription factor activity, sequence-specific DNA binding, zinc ion binding activity, role in regulation of transcription, DNA-templated and nucleus localization  |
| Afu5g12940 | Chr5_A_fumigatus_Af293:3,393,897..3,396,049(+) | Ortholog(s) have cytosol, nucleus localization                                                                                                                                                                       |
| Afu5g12950 | Chr5_A_fumigatus_Af293:3,396,529..3,398,512(+) | Has domain(s) with predicted substrate-specific transmembrane transporter activity, transmembrane transporter activity, role in transmembrane transport and integral component of membrane, membrane localization    |
| Afu5g12960 | Chr5_A_fumigatus_Af293:3,398,724..3,399,710(+) | Putative bZIP-type transcription factor with similarity to atfA                                                                                                                                                      |
| Afu5g12970 | Chr5_A_fumigatus_Af293:3,400,893..3,401,310(+) | protein of unknown function                                                                                                                                                                                          |
| Afu5g12980 | Chr5_A_fumigatus_Af293:3,403,146..3,404,152(+) | Ortholog of Aspergillus glaucus : Aspgl1_0105053 and Aspergillus fumigatus A1163 : AFUB_060700                                                                                                                       |
| Afu5g12990 | Chr5_A_fumigatus_Af293:3,406,140..3,408,009(+) | Snf1 protein kinase complex subunit                                                                                                                                                                                  |
| Afu5g13000 | Chr5_A_fumigatus_Af293:3,408,677..3,410,548(+) | Ortholog(s) have phosphatidylinositol transporter activity                                                                                                                                                           |
| Afu5g13020 | Chr5_A_fumigatus_Af293:3,410,658..3,412,898(+) | Ortholog(s) have DNA-directed DNA polymerase activity, role in DNA replication initiation, telomere capping and alpha DNA polymerase:primase complex, cytosol, nuclear envelope localization                         |
| Afu5g13030 | Chr5_A_fumigatus_Af293:3,413,073..3,413,860(+) | Ortholog of A. nidulans FGSC A4 : AN6854, A. oryzae RIB40 : A0090120000423, Neosartorya fischeri NRRL 181 : NFIA_074070, Aspergillus wentii : Aspwe1_0026749 and Aspergillus versicolor : Aspve1_0211277             |
| Afu5g13040 | Chr5_A_fumigatus_Af293:3,414,201..3,415,930(+) | Ortholog(s) have enzyme regulator activity, guanyl-nucleotide exchange factor activity, translation initiation factor activity and role in regulation of translational initiation                                    |
| Afu5g13050 | Chr5_A_fumigatus_Af293:3,416,535..3,418,950(+) | Ortholog(s) have microtubule motor activity, protein homodimerization activity and cell tip, kinesin complex, medial cortical node, mitotic spindle pole body, nucleus localization                                  |
| Afu5g13060 | Chr5_A_fumigatus_Af293:3,421,138..3,422,353(+) | Ortholog of A. nidulans FGSC A4 : AN6861/phbB, AN9483, A. fumigatus Af293 : Afu3g00670, Afu8g01120, A. niger CBS 513.88 : An03g01130, An07g06330, An07g00905 and A. oryzae RIB40 : A0090120000428, A0090113000089    |
| Afu5g13070 | Chr5_A_fumigatus_Af293:3,423,600..3,425,578(+) | Ortholog of A. nidulans FGSC A4 : AN6859, A. niger CBS 513.88 : An14g06090, A. oryzae RIB40 : A0090120000432, Aspergillus wentii : Aspwe1_0107789 and Aspergillus sydowii : Aspsy1_0085559                           |
| Afu5g13080 | Chr5_A_fumigatus_Af293:3,430,092..3,434,136(+) | Has domain(s) with predicted RNA polymerase II transcription factor activity, sequence-specific DNA binding, zinc ion binding activity, role in regulation of transcription, DNA-templated and nucleus localization  |
| Afu5g13090 | Chr5_A_fumigatus_Af293:3,437,488..3,438,966(+) | Has domain(s) with predicted transferase activity, transferring glycosyl groups activity and role in protein glycosylation                                                                                           |
| Afu5g13100 | Chr5_A_fumigatus_Af293:3,439,399..3,439,899(-) | Ortholog of A. nidulans FGSC A4 : AN6856, A. niger CBS 513.88 : An14g06050, A. oryzae RIB40 : A0090120000435, Aspergillus wentii : Aspwe1_0107169 and Aspergillus sydowii : Aspsy1_0040420                           |
| Afu5g13110 | Chr5_A_fumigatus_Af293:3,440,556..3,441,269(+) | Ortholog(s) have cytosol, nucleus localization                                                                                                                                                                       |
| Afu5g13120 | Chr5_A_fumigatus_Af293:3,441,589..3,442,686(+) | Ortholog(s) have endoplasmic reticulum, nuclear envelope localization                                                                                                                                                |
| Afu5g13130 | Chr5_A_fumigatus_Af293:3,442,869..3,443,857(-) | Putative chorismate mutase                                                                                                                                                                                           |
| Afu5g13140 | Chr5_A_fumigatus_Af293:3,444,254..3,447,140(+) | Ortholog(s) have ubiquitin binding activity, role in mitochondrial fission, mitochondrial genome maintenance, peroxisome fission and mitochondrial outer membrane localization                                       |
| Afu5g13150 | Chr5_A_fumigatus_Af293:3,447,599..3,450,836(+) | Ortholog of A. nidulans FGSC A4 : AN6868, A. niger CBS 513.88 : An14g05990, A. oryzae RIB40 : A0090120000440, Aspergillus wentii : Aspwe1_0050582 and Aspergillus sydowii : Aspsy1_0054814                           |
| Afu5g13160 | Chr5_A_fumigatus_Af293:3,452,444..3,455,043(+) | Has domain(s) with predicted role in transmembrane transport and integral component of membrane localization                                                                                                         |
| Afu5g13170 | Chr5_A_fumigatus_Af293:3,455,726..3,457,692(+) | Putative MATE efflux family protein                                                                                                                                                                                  |
| Afu5g13180 | Chr5_A_fumigatus_Af293:3,458,782..3,460,652(+) | Putative agmatinase, PhoB-regulated                                                                                                                                                                                  |
| Afu5g13190 | Chr5_A_fumigatus_Af293:3,462,822..3,469,726(+) | Has domain(s) with predicted ATP binding, microtubule binding, microtubule motor activity, role in microtubule-based movement and microtubule associated complex localization                                        |
| Afu5g13200 | Chr5_A_fumigatus_Af293:3,469,967..3,470,629(+) | Ortholog of A. nidulans FGSC A4 : AN4261, AN12307, A. fumigatus Af293 : Afu7g03960, A. oryzae RIB40 : A0090020000704, A0090026000045, A0090026000818 and Aspergillus wentii : Aspwe1_0181783                         |
| Afu5g13210 | Chr5_A_fumigatus_Af293:3,470,836..3,472,312(+) | Ortholog(s) have GDP-Man:Man1GlcNAc2-PP-Dol alpha-1,3-mannosyltransferase activity, glycolipid 6-alpha-mannosyltransferase activity and role in oligosaccharide-lipid intermediate biosynthetic process              |
| Afu5g13220 | Chr5_A_fumigatus_Af293:3,472,524..3,474,541(+) | Ortholog(s) have crossover junction endodeoxyribonuclease activity and role in DNA repair, DNA topological change, regulation of reciprocal meiotic recombination, resolution of meiotic recombination intermediates |
| Afu5g13230 | Chr5_A_fumigatus_Af293:3,474,874..3,477,195(-) | Ortholog(s) have fungal-type vacuole membrane localization                                                                                                                                                           |
| Afu5g13240 | Chr5_A_fumigatus_Af293:3,477,213..3,482,789(+) | Has domain(s) with predicted inositol-1,4,5-trisphosphate 3-kinase activity                                                                                                                                          |
| Afu5g13250 | Chr5_A_fumigatus_Af293:3,485,112..3,487,485(+) | Ortholog of A. nidulans FGSC A4 : AN6885, A. niger CBS 513.88 : An14g04640, A. oryzae RIB40 : A0090120000468, Aspergillus sydowii : Aspsy1_0054799 and Aspergillus terreus NIH2624 : ATET_06186                      |
| Afu5g13260 | Chr5_A_fumigatus_Af293:3,488,403..3,488,757(-) | Ortholog of Aspergillus fumigatus A1163 : AFUB_060970                                                                                                                                                                |
| Afu5g13270 | Chr5_A_fumigatus_Af293:3,488,865..3,491,687(+) | pH-response regulator protein                                                                                                                                                                                        |
| Afu5g13280 | Chr5_A_fumigatus_Af293:3,491,768..3,494,412(+) | Ortholog of A. nidulans FGSC A4 : AN6887, A. niger CBS 513.88 : An14g04670, A. oryzae RIB40 : A0090120000470, Aspergillus wentii : Aspwe1_0039072 and Aspergillus sydowii : Aspsy1_0145002                           |
| Afu5g13290 | Chr5_A_fumigatus_Af293:3,494,584..3,496,310(+) | Has domain(s) with predicted role in transmembrane transport and integral component of membrane localization                                                                                                         |
| Afu5g13300 | Chr5_A_fumigatus_Af293:3,496,895..3,499,105(-) | Putative extracellular aspartic endopeptidase                                                                                                                                                                        |
| Afu5g13310 | Chr5_A_fumigatus_Af293:3,500,569..3,505,002(+) | Ortholog(s) have RNA polymerase II transcription factor activity, sequence-specific DNA binding, sequence-specific DNA binding activity                                                                              |
| Afu5g13320 | Chr5_A_fumigatus_Af293:3,505,018..3,507,277(+) | Ortholog(s) have cytosol localization                                                                                                                                                                                |
| Afu5g13330 | Chr5_A_fumigatus_Af293:3,507,706..3,508,803(+) | Ortholog of A. nidulans FGSC A4 : AN6891, A. niger CBS 513.88 : An14g04740, A. oryzae RIB40 : A0090120000478, Aspergillus wentii : Aspwe1_0050596 and Aspergillus sydowii : Aspsy1_0085527                           |
| Afu5g13340 | Chr5_A_fumigatus_Af293:3,509,452..3,511,837(-) | Ortholog(s) have magnesium-dependent protein serine/threonine phosphatase activity                                                                                                                                   |
| Afu5g13350 | Chr5_A_fumigatus_Af293:3,512,436..3,514,578(+) | Putative peptidyl-prolyl cis-trans isomerase                                                                                                                                                                         |

|            |                                                |                                                                                                                                                                                                                                            |
|------------|------------------------------------------------|--------------------------------------------------------------------------------------------------------------------------------------------------------------------------------------------------------------------------------------------|
| Afu5g13360 | Chr5_A_fumigatus_Af293:3,514,875..3,517,467(-) | Ortholog(s) have mRNA binding activity                                                                                                                                                                                                     |
| Afu5g13370 | Chr5_A_fumigatus_Af293:3,517,576..3,520,528(+) | Ortholog(s) have ATP-dependent 5'-3' DNA helicase activity, single-stranded DNA-dependent ATP-dependent DNA helicase activity                                                                                                              |
| Afu5g13380 | Chr5_A_fumigatus_Af293:3,521,064..3,524,202(+) | Ortholog(s) have protein complex scaffold activity and role in mitotic DNA damage checkpoint, mitotic DNA replication checkpoint, mitotic DNA replication preinitiation complex assembly                                                   |
| Afu5g13392 | Chr5_A_fumigatus_Af293:3,524,528..3,527,656(+) | Ortholog(s) have GTPase activity, protein homodimerization activity, role in mitochondrial fusion, mitochondrial localization and integral component of mitochondrial outer membrane, mitochondrial inner membrane localization            |
| Afu5g13410 | Chr5_A_fumigatus_Af293:3,527,728..3,529,048(+) | Ortholog(s) have role in asexual sporulation resulting in formation of a cellular spore, intraluminal vesicle formation and protein retention in Golgi apparatus, more                                                                     |
| Afu5g13420 | Chr5_A_fumigatus_Af293:3,529,175..3,531,137(+) | Has domain(s) with predicted ATP binding, protein kinase activity, protein tyrosine kinase activity and role in protein phosphorylation                                                                                                    |
| Afu5g13440 | Chr5_A_fumigatus_Af293:3,532,442..3,535,491(+) | protein of unknown function                                                                                                                                                                                                                |
| Afu5g13450 | Chr5_A_fumigatus_Af293:3,535,529..3,536,876(+) | Putative triosephosphate isomerase                                                                                                                                                                                                         |
| Afu5g13460 | Chr5_A_fumigatus_Af293:3,537,223..3,538,820(+) | Ortholog(s) have role in establishment of mitochondrion localization, mitochondrial outer membrane translocase complex assembly, mitochondrion distribution and mitochondrion morphogenesis, more                                          |
| Afu5g13470 | Chr5_A_fumigatus_Af293:3,538,964..3,539,883(+) | Ortholog(s) have role in cellular response to drug, nuclear-transcribed mRNA catabolic process, rRNA processing, ribosomal large subunit assembly and nucleolus, nucleoplasm, preribosome, large subunit precursor localization            |
| Afu5g13480 | Chr5_A_fumigatus_Af293:3,540,595..3,542,227(-) | Ortholog(s) have U1 snRNP, cytosol localization                                                                                                                                                                                            |
| Afu5g13490 | Chr5_A_fumigatus_Af293:3,542,237..3,542,887(+) | Ortholog(s) have structural constituent of ribosome activity and mitochondrial large ribosomal subunit localization                                                                                                                        |
| Afu5g13500 | Chr5_A_fumigatus_Af293:3,543,314..3,544,712(-) | Has domain(s) with predicted zinc ion binding activity                                                                                                                                                                                     |
| Afu5g13510 | Chr5_A_fumigatus_Af293:3,544,752..3,546,764(+) | Ortholog(s) have Prp19 complex, cytosol, nuclear envelope, spliceosomal complex localization                                                                                                                                               |
| Afu5g13520 | Chr5_A_fumigatus_Af293:3,547,913..3,551,862(+) | Ortholog(s) have GTPase activity, role in mature ribosome assembly and cytosol localization                                                                                                                                                |
| Afu5g13530 | Chr5_A_fumigatus_Af293:3,551,872..3,553,268(+) | Ortholog(s) have role in exonucleolytic trimming to generate mature 3'-end of 5.8S rRNA from tricistronic rRNA transcript (SSU-rRNA, 5.8S rRNA and LSU-rRNA), more                                                                         |
| Afu5g13540 | Chr5_A_fumigatus_Af293:3,553,294..3,556,310(+) | Ortholog(s) have role in cellular response to biotic stimulus, filamentous growth of a population of unicellular organisms in response to biotic stimulus, hyphal growth, vacuole inheritance                                              |
| Afu5g13550 | Chr5_A_fumigatus_Af293:3,557,407..3,558,132(+) | Ortholog of <i>Aspergillus fumigatus</i> A1163 : AFUB_061250                                                                                                                                                                               |
| Afu5g13560 | Chr5_A_fumigatus_Af293:3,560,271..3,562,553(+) | Ortholog of <i>A. nidulans</i> FGSC A4 : AN6908, <i>A. niger</i> CBS 513.88 : An14g05050, <i>A. oryzae</i> RIB40 : AO090113000013, <i>Aspergillus wentii</i> : Aspwe1_0452655 and <i>Aspergillus sydowii</i> : Aspsy1_0589528              |
| Afu5g13570 | Chr5_A_fumigatus_Af293:3,564,070..3,565,005(+) | Ortholog of <i>Aspergillus fumigatus</i> A1163 : AFUB_061270 and <i>Aspergillus niger</i> ATCC 1015 : 41862-mRNA                                                                                                                           |
| Afu5g13580 | Chr5_A_fumigatus_Af293:3,565,620..3,567,323(+) | Ortholog of <i>A. oryzae</i> RIB40 : AO090009000162, <i>Aspergillus glaucus</i> : Aspgl1_0157437, <i>Neosartorya fischeri</i> NRRL 181 : NFIA_073460 and <i>Aspergillus clavatus</i> NRRL 1 : ACLA_016570                                  |
| Afu5g13590 | Chr5_A_fumigatus_Af293:3,567,578..3,568,954(+) | protein of unknown function                                                                                                                                                                                                                |
| Afu5g13600 | Chr5_A_fumigatus_Af293:3,568,967..3,571,935(+) | Ortholog(s) have cytosol, nucleus localization                                                                                                                                                                                             |
| Afu5g13610 | Chr5_A_fumigatus_Af293:3,571,974..3,572,617(-) | Ortholog of <i>A. nidulans</i> FGSC A4 : AN6912, <i>A. niger</i> CBS 513.88 : An14g05140, <i>Aspergillus wentii</i> : Aspwe1_0067652 and <i>Aspergillus sydowii</i> : Aspsy1_0075810                                                       |
| Afu5g13620 | Chr5_A_fumigatus_Af293:3,572,784..3,575,128(+) | Ortholog(s) have ubiquitin-specific protease activity, role in protein deubiquitination and endoplasmic reticulum localization                                                                                                             |
| Afu5g13630 | Chr5_A_fumigatus_Af293:3,575,248..3,576,231(+) | Has domain(s) with predicted calcium ion binding activity                                                                                                                                                                                  |
| Afu5g13640 | Chr5_A_fumigatus_Af293:3,576,727..3,578,641(+) | Has domain(s) with predicted role in cell redox homeostasis                                                                                                                                                                                |
| Afu5g13650 | Chr5_A_fumigatus_Af293:3,579,472..3,580,637(-) | Transcript up-regulated in conidia exposed to neutrophils                                                                                                                                                                                  |
| Afu5g13670 | Chr5_A_fumigatus_Af293:3,590,279..3,591,480(+) | Ortholog of <i>Aspergillus fumigatus</i> A1163 : AFUB_061380                                                                                                                                                                               |
| Afu5g13680 | Chr5_A_fumigatus_Af293:3,591,557..3,592,103(+) | Ortholog of <i>Aspergillus fumigatus</i> A1163 : AFUB_061390                                                                                                                                                                               |
| Afu5g13690 | Chr5_A_fumigatus_Af293:3,595,959..3,596,339(+) | Ortholog of <i>Neosartorya fischeri</i> NRRL 181 : NFIA_073370, <i>Aspergillus versicolor</i> : Aspve1_0040392, <i>Aspergillus fumigatus</i> A1163 : AFUB_061410 and <i>Aspergillus sydowii</i> : Aspsy1_0043473                           |
| Afu5g13710 | Chr5_A_fumigatus_Af293:3,600,517..3,603,725(+) | Putative carboxylesterase                                                                                                                                                                                                                  |
| Afu5g13715 | Chr5_A_fumigatus_Af293:3,604,288..3,606,254(+) | Ortholog of <i>A. nidulans</i> FGSC A4 : AN3395, AN7406, <i>A. niger</i> CBS 513.88 : An02g14300, An14g03530, <i>Aspergillus versicolor</i> : Aspve1_0038904 and <i>Aspergillus clavatus</i> NRRL 1 : ACLA_076630                          |
| Afu5g13725 | Chr5_A_fumigatus_Af293:3,608,573..3,611,821(+) | Ortholog of <i>A. nidulans</i> FGSC A4 : AN6413, AN6419, AN6946, AN5312, AN5664, AN8328, AN3241, AN10369, AN1930, AN2386, AN1738, AN1159, AN8984, AN8951, AN1540, AN8971, AN9387, AN9266, AN9306, AN1317, AN10886, AN7232, AN7774, AN12202 |
| Afu5g13730 | Chr5_A_fumigatus_Af293:3,612,257..3,613,798(+) | Ortholog of <i>Aspergillus fumigatus</i> A1163 : AFUB_061470                                                                                                                                                                               |
| Afu5g13740 | Chr5_A_fumigatus_Af293:3,615,778..3,616,943(+) | Has domain(s) with predicted catalytic activity                                                                                                                                                                                            |
| Afu5g13750 | Chr5_A_fumigatus_Af293:3,617,376..3,618,452(+) | Has domain(s) with predicted calcium ion binding activity                                                                                                                                                                                  |
| Afu5g13760 | Chr5_A_fumigatus_Af293:3,619,848..3,621,200(+) | protein of unknown function                                                                                                                                                                                                                |
| Afu5g13770 | Chr5_A_fumigatus_Af293:3,622,403..3,623,319(+) | Ortholog of <i>Aspergillus fumigatus</i> A1163 : AFUB_061510                                                                                                                                                                               |
| Afu5g13780 | Chr5_A_fumigatus_Af293:3,623,758..3,625,179(+) | Ortholog of <i>A. nidulans</i> FGSC A4 : AN5292, AN7640, <i>A. fumigatus</i> Af293 : Afu5g12490, <i>A. niger</i> CBS 513.88 : An14g06730 and <i>A. oryzae</i> RIB40 : AO090120000374, AO090020000661                                       |
| Afu5g13790 | Chr5_A_fumigatus_Af293:3,625,262..3,626,851(+) | Has domain(s) with predicted RNA polymerase II transcription factor activity, sequence-specific DNA binding, zinc ion binding activity, role in regulation of transcription, DNA-templated and nucleus localization                        |
| Afu5g13800 | Chr5_A_fumigatus_Af293:3,627,171..3,627,956(+) | Has domain(s) with predicted FMN binding, oxidoreductase activity and role in oxidation-reduction process                                                                                                                                  |
| Afu5g13810 | Chr5_A_fumigatus_Af293:3,628,384..3,629,848(+) | Transulfuration enzyme family protein                                                                                                                                                                                                      |
| Afu5g13820 | Chr5_A_fumigatus_Af293:3,629,930..3,630,945(+) | Ortholog of <i>Neosartorya fischeri</i> NRRL 181 : NFIA_073110, <i>Aspergillus fumigatus</i> A1163 : AFUB_061560 and <i>Aspergillus clavatus</i> NRRL 1 : ACLA_016800                                                                      |
| Afu5g13830 | Chr5_A_fumigatus_Af293:3,631,406..3,633,004(+) | Ortholog(s) have galactosidase activity                                                                                                                                                                                                    |
| Afu5g13840 | Chr5_A_fumigatus_Af293:3,633,218..3,634,121(+) | Ortholog(s) have hydrolase activity, role in glycolytic process, nucleotide catabolic process, penicillin biosynthetic process, sterigmatocystin biosynthetic process and cytosol localization                                             |
| Afu5g13850 | Chr5_A_fumigatus_Af293:3,634,853..3,637,276(+) | Putative oligopeptide transporter                                                                                                                                                                                                          |
| Afu5g13865 | Chr5_A_fumigatus_Af293:3,637,668..3,640,022(+) | Ortholog(s) have ATP-dependent RNA helicase inhibitor activity, RNA binding activity                                                                                                                                                       |
| Afu5g13890 | Chr5_A_fumigatus_Af293:3,640,458..3,641,207(+) | Ortholog(s) have role in asexual sporulation resulting in formation of a cellular spore, cellular response to pH, endosome organization, hyphal growth and intraluminal vesicle formation, more                                            |
| Afu5g13920 | Chr5_A_fumigatus_Af293:3,643,547..3,645,141(+) | Putative Hsp90 binding co-chaperone                                                                                                                                                                                                        |
| Afu5g13930 | Chr5_A_fumigatus_Af293:3,645,629..3,646,879(+) | Ortholog(s) have mRNA binding activity, role in cytoplasmic translation and cytoplasm, polysomal ribosome localization                                                                                                                     |
| Afu5g13940 | Chr5_A_fumigatus_Af293:3,647,368..3,648,558(+) | Has domain(s) with predicted oxidoreductase activity and role in oxidation-reduction process                                                                                                                                               |
| Afu5g13970 | Chr5_A_fumigatus_Af293:3,650,128..3,656,167(+) | Ortholog(s) have role in conidiophore development, hyphal growth, sporocarp development involved in sexual reproduction, syncytium formation by plasma membrane fusion                                                                     |
| Afu5g13990 | Chr5_A_fumigatus_Af293:3,656,748..3,658,181(+) | Ortholog of <i>A. nidulans</i> FGSC A4 : AN2703, <i>A. niger</i> CBS 513.88 : An14g05420, <i>A. oryzae</i> RIB40 : AO090113000104, <i>Aspergillus wentii</i> : Aspwe1_0453318 and <i>Aspergillus sydowii</i> : Aspsy1_0155176              |
| Afu5g13995 | Chr5_A_fumigatus_Af293:3,658,304..3,659,254(+) | Has domain(s) with predicted hydrolase activity, hydrolyzing O-glycosyl compounds activity and role in carbohydrate metabolic process                                                                                                      |
| Afu5g14000 | Chr5_A_fumigatus_Af293:3,659,835..3,661,209(+) | Has domain(s) with predicted oxidoreductase activity and role in metabolic process                                                                                                                                                         |
| Afu5g14010 | Chr5_A_fumigatus_Af293:3,661,317..3,663,206(+) | Ortholog(s) have role in snoRNA metabolic process and cytoplasm, nucleus localization                                                                                                                                                      |
| Afu5g14020 | Chr5_A_fumigatus_Af293:3,663,219..3,665,761(+) | Ortholog(s) have nuclear periphery localization                                                                                                                                                                                            |
| Afu5g14030 | Chr5_A_fumigatus_Af293:3,666,645..3,668,270(+) | Ortholog of <i>A. nidulans</i> FGSC A4 : AN2690, <i>A. niger</i> CBS 513.88 : An14g05490, <i>A. oryzae</i> RIB40 : AO090113000118, <i>Aspergillus wentii</i> : Aspwe1_0453526 and <i>Aspergillus sydowii</i> : Aspsy1_0155771              |
| Afu5g14040 | Chr5_A_fumigatus_Af293:3,668,387..3,672,523(+) | Ortholog(s) have SUMO-specific protease activity and role in protein desumoylation                                                                                                                                                         |
| Afu5g14050 | Chr5_A_fumigatus_Af293:3,672,792..3,675,072(+) | Has domain(s) with predicted catalytic activity and membrane localization                                                                                                                                                                  |
| Afu5g14060 | Chr5_A_fumigatus_Af293:3,676,056..3,677,836(+) | Putative Rho-type GTPase                                                                                                                                                                                                                   |
| Afu5g14070 | Chr5_A_fumigatus_Af293:3,678,014..3,678,515(+) | Has domain(s) with predicted role in mitotic spindle organization in nucleus and DASH complex, mitotic spindle localization                                                                                                                |
| Afu5g14080 | Chr5_A_fumigatus_Af293:3,679,540..3,680,694(+) | Ortholog of <i>A. nidulans</i> FGSC A4 : AN2640, <i>A. niger</i> CBS 513.88 : An12g05640, <i>Neosartorya fischeri</i> NRRL 181 : NFIA_072900 and <i>Aspergillus versicolor</i> : Aspve1_0040725                                            |
| Afu5g14090 | Chr5_A_fumigatus_Af293:3,682,264..3,685,263(+) | Has domain(s) with predicted catalytic activity, hydrolase activity, hydrolyzing O-glycosyl compounds activity and role in carbohydrate metabolic process                                                                                  |

|            |                                                |                                                                                                                                                                                                                                          |
|------------|------------------------------------------------|------------------------------------------------------------------------------------------------------------------------------------------------------------------------------------------------------------------------------------------|
| Afu5g14100 | Chr5_A_fumigatus_Af293:3,686,207..3,687,150(-) | Ortholog of A. niger CBS 513.88 : An02g01070, Aspergillus brasiliensis : Aspbr1_0072526, Aspergillus flavus NRRL 3357 : AFL2T_11035 and Neosartorya fischeri NRRL 181 : NFIA_072860                                                      |
| Afu5g14110 | Chr5_A_fumigatus_Af293:3,687,288..3,687,656(-) | Ortholog of Aspergillus fumigatus A1163 : AFUB_061800                                                                                                                                                                                    |
| Afu5g14120 | Chr5_A_fumigatus_Af293:3,687,913..3,688,824(-) | Ortholog(s) have cytosol, nucleus localization                                                                                                                                                                                           |
| Afu5g14130 | Chr5_A_fumigatus_Af293:3,689,498..3,690,581(+) | Ortholog of A. nidulans FGSC A4 : AN1600, AN9354, AN4608 and A. fumigatus Af293 : Afu4g03520, Afu7g06920                                                                                                                                 |
| Afu5g14140 | Chr5_A_fumigatus_Af293:3,690,998..3,693,368(+) | Has domain(s) with predicted DNA binding, RNA polymerase II transcription factor activity, sequence-specific DNA binding, zinc ion binding activity and role in regulation of transcription, DNA-templated, transcription, DNA-templated |
| Afu5g14150 | Chr5_A_fumigatus_Af293:3,694,494..3,696,099(+) | Has domain(s) with predicted triglyceride lipase activity and role in lipid catabolic process                                                                                                                                            |
| Afu5g14160 | Chr5_A_fumigatus_Af293:3,697,530..3,698,134(-) | Ortholog of Aspergillus fumigatus A1163 : AFUB_061850                                                                                                                                                                                    |
| Afu5g14170 | Chr5_A_fumigatus_Af293:3,699,067..3,699,625(-) | Ortholog of Aspergillus fumigatus A1163 : AFUB_061860                                                                                                                                                                                    |
| Afu5g14180 | Chr5_A_fumigatus_Af293:3,699,978..3,701,185(+) | Ortholog of A. nidulans FGSC A4 : AN1786, A. niger CBS 513.88 : An14g05580, A. oryzae RIB40 : AO090001000217, Aspergillus wentii : Aspwe1_0179974 and Aspergillus sydowii : Aspsy1_0026595                                               |
| Afu5g14190 | Chr5_A_fumigatus_Af293:3,701,409..3,703,309(+) | Beta glucanase                                                                                                                                                                                                                           |
| Afu5g14200 | Chr5_A_fumigatus_Af293:3,703,586..3,705,688(+) | Ortholog of A. nidulans FGSC A4 : AN0196, A. fumigatus Af293 : Afu6g13810, Afu7g05110, Afu8g01720, A. niger CBS 513.88 : An13g02610, An15g02090, An04g09640 and A. oryzae RIB40 : AO090003001444                                         |
| Afu5g14210 | Chr5_A_fumigatus_Af293:3,705,868..3,706,130(-) | Glucose-repressible gene                                                                                                                                                                                                                 |
| Afu5g14220 | Chr5_A_fumigatus_Af293:3,706,433..3,707,309(-) | Ortholog of Aspergillus fumigatus A1163 : AFUB_061920                                                                                                                                                                                    |
| Afu5g14230 | Chr5_A_fumigatus_Af293:3,708,234..3,709,929(+) | Has domain(s) with predicted RNA polymerase II transcription factor activity, sequence-specific DNA binding, transcription factor activity, sequence-specific DNA binding, zinc ion binding activity                                     |
| Afu5g14240 | Chr5_A_fumigatus_Af293:3,712,963..3,713,643(+) | Ortholog of A. nidulans FGSC A4 : AN6760, AN8527, A. fumigatus Af293 : Afu4g01400, Afu5g02670, A. niger CBS 513.88 : An07g09050, An08g09630 and Aspergillus wentii : Aspwe1_0069899, Aspwe1_0185315, Aspwe1_0186212                      |
| Afu5g14250 | Chr5_A_fumigatus_Af293:3,714,031..3,714,984(+) | Ortholog of A. nidulans FGSC A4 : AN7782, A. niger CBS 513.88 : An14g05590, A. oryzae RIB40 : AO090001000199, Aspergillus wentii : Aspwe1_0028859 and Aspergillus sydowii : Aspsy1_0046329                                               |
| Afu5g14260 | Chr5_A_fumigatus_Af293:3,715,059..3,715,517(+) | Ortholog(s) have electron carrier activity, role in ergosterol biosynthetic process and endoplasmic reticulum membrane localization                                                                                                      |
| Afu5g14270 | Chr5_A_fumigatus_Af293:3,715,548..3,717,820(-) | Has domain(s) with predicted catalytic activity and role in metabolic process                                                                                                                                                            |
| Afu5g14280 | Chr5_A_fumigatus_Af293:3,718,196..3,719,894(-) | Ortholog of Aspergillus fumigatus A1163 : AFUB_061990                                                                                                                                                                                    |
| Afu5g14290 | Chr5_A_fumigatus_Af293:3,720,488..3,723,757(-) | Has domain(s) with predicted DNA binding, RNA polymerase II transcription factor activity, sequence-specific DNA binding, zinc ion binding activity and role in regulation of transcription, DNA-templated, transcription, DNA-templated |
| Afu5g14300 | Chr5_A_fumigatus_Af293:3,728,017..3,730,042(+) | Putative trehalose-6-phosphate synthase                                                                                                                                                                                                  |
| Afu5g14310 | Chr5_A_fumigatus_Af293:3,730,662..3,731,858(+) | Has domain(s) with predicted oxidoreductase activity and role in metabolic process                                                                                                                                                       |
| Afu5g14315 | Chr5_A_fumigatus_Af293:3,731,908..3,733,116(-) | Ortholog of A. oryzae RIB40 : AO090701000372, Neosartorya fischeri NRRL 181 : NFIA_072570, Aspergillus wentii : Aspwe1_0042955, Aspwe1_0063639 and Aspergillus versicolor : Aspve1_0035102, Aspve1_0087828                               |
| Afu5g14320 | Chr5_A_fumigatus_Af293:3,733,224..3,735,879(-) | Ortholog of A. nidulans FGSC A4 : AN2683, AN5069, A. fumigatus Af293 : Afu5g02860, A. niger CBS 513.88 : An09g04830, An14g05730 and A. oryzae RIB40 : AO090102000482, AO090001000197                                                     |
| Afu5g14330 | Chr5_A_fumigatus_Af293:3,736,232..3,737,853(+) | 12-oxophytodienoate reductase                                                                                                                                                                                                            |
| Afu5g14340 | Chr5_A_fumigatus_Af293:3,737,907..3,738,880(-) | Has domain(s) with predicted oxidoreductase activity and role in metabolic process                                                                                                                                                       |
| Afu5g14345 | Chr5_A_fumigatus_Af293:3,739,414..3,739,623(-) | Ortholog of Aspergillus fumigatus A1163 : AFUB_062070                                                                                                                                                                                    |
| Afu5g14350 | Chr5_A_fumigatus_Af293:3,739,719..3,741,228(+) | C-24(28) sterol reductase                                                                                                                                                                                                                |
| Afu5g14360 | Chr5_A_fumigatus_Af293:3,741,300..3,743,416(-) | Has domain(s) with predicted DNA binding, zinc ion binding activity, role in transcription, DNA-templated and nucleus localization                                                                                                       |
| Afu5g14380 | Chr5_A_fumigatus_Af293:3,744,313..3,746,835(+) | Alpha-glucuronidase                                                                                                                                                                                                                      |
| Afu5g14390 | Chr5_A_fumigatus_Af293:3,747,371..3,749,191(-) | Putative C6 transcription factor                                                                                                                                                                                                         |
| Afu5g14410 | Chr5_A_fumigatus_Af293:3,749,485..3,751,272(+) | Putative cysteine dioxygenase                                                                                                                                                                                                            |
| Afu5g14420 | Chr5_A_fumigatus_Af293:3,751,275..3,753,764(+) | Ortholog of A. nidulans FGSC A4 : AN9361, A. niger CBS 513.88 : An05g01800, A. oryzae RIB40 : AO090103000493, Aspergillus wentii : Aspwe1_0041204 and Aspergillus sydowii : Aspsy1_0051612                                               |
| Afu5g14490 | Chr5_A_fumigatus_Af293:3,760,906..3,762,694(+) | Has domain(s) with predicted role in transmembrane transport and integral component of membrane localization                                                                                                                             |
| Afu5g14500 | Chr5_A_fumigatus_Af293:3,762,729..3,765,108(-) | Has domain(s) with predicted role in transmembrane transport and integral component of membrane localization                                                                                                                             |
| Afu5g14510 | Chr5_A_fumigatus_Af293:3,765,129..3,766,445(-) | Ortholog of A. niger CBS 513.88 : An06g02470, Aspergillus brasiliensis : Aspbr1_0060254, Neosartorya fischeri NRRL 181 : NFIA_072450 and Aspergillus fumigatus A1163 : AFUB_062190                                                       |
| Afu5g14520 | Chr5_A_fumigatus_Af293:3,767,027..3,768,238(+) | Ortholog of Neosartorya fischeri NRRL 181 : NFIA_072440, Aspergillus fumigatus A1163 : AFUB_062200, Aspergillus clavatus NRRL 1 : ACLA_017360 and Aspergillus zonatus : Aspzo1_0136732                                                   |
| Afu5g14530 | Chr5_A_fumigatus_Af293:3,768,297..3,770,530(-) | Ortholog(s) have hydrolase activity, hydrolyzing O-glycosyl compounds activity and role in cellulose catabolic process, positive regulation of cellulose catabolic process, regulation of glycogen metabolic process                     |
| Afu5g14540 | Chr5_A_fumigatus_Af293:3,770,727..3,772,681(-) | Has domain(s) with predicted substrate-specific transmembrane transporter activity, transmembrane transporter activity, role in transmembrane transport and integral component of membrane, membrane localization                        |
| Afu5g14550 | Chr5_A_fumigatus_Af293:3,773,063..3,776,828(+) | Ortholog(s) have role in lactose metabolic process                                                                                                                                                                                       |
| Afu5g14560 | Chr5_A_fumigatus_Af293:3,777,106..3,778,726(+) | Has domain(s) with predicted catalytic activity, hydrolase activity, hydrolyzing O-glycosyl compounds activity and role in carbohydrate metabolic process                                                                                |
| Afu5g14570 | Chr5_A_fumigatus_Af293:3,778,950..3,780,479(-) | Ortholog of A. nidulans FGSC A4 : AN3322, Neosartorya fischeri NRRL 181 : NFIA_072390 and Aspergillus fumigatus A1163 : AFUB_062250                                                                                                      |
| Afu5g14582 | Chr5_A_fumigatus_Af293:3,781,952..3,785,288(-) | Has domain(s) with predicted catalytic activity and role in nucleoside metabolic process                                                                                                                                                 |
| Afu5g14600 | Chr5_A_fumigatus_Af293:3,786,987..3,787,774(+) | Ortholog of A. nidulans FGSC A4 : AN8144, AN1651, A. fumigatus Af293 : Afu6g00460, Afu6g13950, A. niger CBS 513.88 : An11g02490, An01g11420 and A. oryzae RIB40 : AO090001000384, AO090001000740                                         |
| Afu5g14610 | Chr5_A_fumigatus_Af293:3,788,121..3,789,763(-) | Putative carboxypeptidase Y                                                                                                                                                                                                              |
| Afu5g14620 | Chr5_A_fumigatus_Af293:3,790,328..3,790,915(+) | Ortholog of Aspergillus fumigatus A1163 : AFUB_062290                                                                                                                                                                                    |
| Afu5g14630 | Chr5_A_fumigatus_Af293:3,790,987..3,791,391(+) | Ortholog of Aspergillus fumigatus A1163 : AFUB_062300                                                                                                                                                                                    |
| Afu5g14640 | Chr5_A_fumigatus_Af293:3,791,791..3,792,708(+) | Has domain(s) with predicted hydrolase activity, hydrolase activity, acting on acid halide bonds, in C-halide compounds activity and role in metabolic process                                                                           |
| Afu5g14650 | Chr5_A_fumigatus_Af293:3,794,320..3,794,669(+) | Putative RING finger protein                                                                                                                                                                                                             |
| Afu5g14660 | Chr5_A_fumigatus_Af293:3,794,749..3,797,326(-) | Ortholog of A. nidulans FGSC A4 : AN3345, AN3347, A. fumigatus Af293 : Afu5g00710, A. niger CBS 513.88 : An16g06090, An12g10000/gabA and A. oryzae RIB40 : AO090166000026, AO090005000509, AO090005001081                                |
| Afu5g14670 | Chr5_A_fumigatus_Af293:3,798,029..3,799,324(+) | Ortholog of A. niger CBS 513.88 : An12g09990 and Aspergillus fumigatus A1163 : AFUB_062340                                                                                                                                               |
| Afu5g14680 | Chr5_A_fumigatus_Af293:3,799,759..3,800,442(+) | Protein with Yap1-dependent induction in response to hydrogen peroxide                                                                                                                                                                   |
| Afu5g14690 | Chr5_A_fumigatus_Af293:3,800,550..3,801,486(-) | Has domain(s) with predicted ATP adenyllyltransferase activity                                                                                                                                                                           |
| Afu5g14700 | Chr5_A_fumigatus_Af293:3,801,990..3,802,183(-) | Ortholog of Aspergillus fumigatus A1163 : AFUB_062370                                                                                                                                                                                    |
| Afu5g14710 | Chr5_A_fumigatus_Af293:3,802,659..3,804,069(+) | Ortholog of Neosartorya fischeri NRRL 181 : NFIA_072270, Aspergillus versicolor : Aspve1_0129744, Aspergillus fumigatus A1163 : AFUB_062380 and Aspergillus clavatus NRRL 1 : ACLA_017450                                                |
| Afu5g14720 | Chr5_A_fumigatus_Af293:3,804,392..3,805,903(-) | Ortholog of A. nidulans FGSC A4 : AN7942, AN7872, AN5510, AN3420, AN2700, AN9050, AN8973, AN11222, AN10911, AN1749 and A. fumigatus Af293 : Afu1g12450, Afu2g00880, Afu2g17800, Afu2g17880, Afu7g06590                                   |
| Afu5g14730 | Chr5_A_fumigatus_Af293:3,806,706..3,808,068(+) | Has domain(s) with predicted oxidoreductase activity and role in oxidation-reduction process                                                                                                                                             |
| Afu5g14740 | Chr5_A_fumigatus_Af293:3,810,067..3,811,228(+) | L-fucose-specific lectin                                                                                                                                                                                                                 |
| Afu5g14750 | Chr5_A_fumigatus_Af293:3,811,726..3,812,598(+) | Ortholog of A. nidulans FGSC A4 : AN0198, A. niger CBS 513.88 : An14g07220, Aspergillus wentii : Aspwe1_0043650, Aspwe1_0044769 and Aspergillus sydowii : Aspsy1_0040680                                                                 |
| Afu5g14760 | Chr5_A_fumigatus_Af293:3,812,828..3,813,315(+) | Ortholog of A. niger CBS 513.88 : An05g01370, A. oryzae RIB40 : AO090001000123, Neosartorya fischeri NRRL 181 : NFIA_072220 and Aspergillus wentii : Aspwe1_0724935                                                                      |
| Afu5g14770 | Chr5_A_fumigatus_Af293:3,814,249..3,815,513(-) | Has domain(s) with predicted oxidoreductase activity, pyrroline-5-carboxylate reductase activity and role in oxidation-reduction process, proline biosynthetic process                                                                   |
| Afu5g14780 | Chr5_A_fumigatus_Af293:3,818,808..3,821,303(+) | Putative trehalase phosphorylase with a predicted role in the glucose-1-phosphate pathway                                                                                                                                                |
| Afu5g14790 | Chr5_A_fumigatus_Af293:3,822,466..3,824,886(+) | Putative phosphoenol pyruvate synthase                                                                                                                                                                                                   |
| Afu5g14800 | Chr5_A_fumigatus_Af293:3,825,104..3,826,608(-) | Lactate dehydrogenase                                                                                                                                                                                                                    |
| Afu5g14810 | Chr5_A_fumigatus_Af293:3,828,015..3,830,041(+) | Putative pyruvate decarboxylase                                                                                                                                                                                                          |

Afu5g14820 Chr5\_A\_fumigatus\_Af293:3,830,428..3,832,037(-) Has domain(s) with predicted ATP binding, nucleoside-triphosphatase activity, nucleotide binding activity  
 Afu5g14830 Chr5\_A\_fumigatus\_Af293:3,833,301..3,833,733(-) Ortholog of A. nidulans FGSC A4 : AN8989, A. oryzae RIB40 : AO09001000186, Neosartorya fischeri NRRL 181 : NFIA\_041290 and Aspergillus wentii : Aspwe1\_0039524, Aspwe1\_0045369  
 Afu5g14840 Chr5\_A\_fumigatus\_Af293:3,834,455..3,835,135(-) Ortholog of A. nidulans FGSC A4 : AN4127, A. fumigatus Af293 : Afu5g14680, A. niger CBS 513.88 : An15g05400, Neosartorya fischeri NRRL 181 : NFIA\_072290 and Aspergillus wentii : Aspwe1\_0041184  
 Afu5g14845 Chr5\_A\_fumigatus\_Af293:3,836,427..3,837,563(+) Has domain(s) with predicted zinc ion binding activity  
 Afu5g14850 Chr5\_A\_fumigatus\_Af293:3,838,802..3,840,474(-) protein of unknown function  
 Afu5g14860 Chr5\_A\_fumigatus\_Af293:3,841,417..3,842,238(-) Has domain(s) with predicted electron carrier activity, heme binding, iron ion binding, oxidoreductase activity, acting on paired donors, with incorporation or reduction of molecular oxygen activity and role in oxidation-reduction process  
 Afu5g14865 Chr5\_A\_fumigatus\_Af293:3,842,373..3,845,049(+) protein of unknown function  
 Afu5g14870 Chr5\_A\_fumigatus\_Af293:3,845,841..3,847,633(-) Putative protein serine/threonine kinase  
 Afu5g14880 Chr5\_A\_fumigatus\_Af293:3,847,948..3,849,477(-) Ortholog(s) have mitochondrion localization  
 Afu5g14890 Chr5\_A\_fumigatus\_Af293:3,849,926..3,851,084(-) Ortholog of A. nidulans FGSC A4 : AN4143, AN12170, A. fumigatus Af293 : Afu1g00760, Aspergillus wentii : Aspwe1\_0177868, Aspwe1\_0403846 and Aspergillus niger ATCC 1015 : 41666-mRNA  
 Afu5g14900 Chr5\_A\_fumigatus\_Af293:3,851,274..3,852,983(+) Ortholog of Aspergillus fumigatus A1163 : AFUB\_079010  
 Afu5g14910 Chr5\_A\_fumigatus\_Af293:3,853,365..3,853,944(-) Ortholog of Aspergillus fumigatus A1163 : AFUB\_079020  
 Afu5g14920 Chr5\_A\_fumigatus\_Af293:3,857,350..3,859,552(+) protein of unknown function  
 Afu5g14930 Chr5\_A\_fumigatus\_Af293:3,862,407..3,865,284(-) protein of unknown function  
 Afu5g14940 Chr5\_A\_fumigatus\_Af293:3,867,797..3,869,542(+) Putative cell surface metalloredutase  
 Afu5g14950 Chr5\_A\_fumigatus\_Af293:3,870,635..3,872,465(+) protein of unknown function  
 Afu5g14960 Chr5\_A\_fumigatus\_Af293:3,873,055..3,873,408(-) Ortholog of Aspergillus fumigatus A1163 : AFUB\_079070  
 Afu5g14970 Chr5\_A\_fumigatus\_Af293:3,873,578..3,874,273(-) Ortholog of A. oryzae RIB40 : AO090010000299 and Aspergillus fumigatus A1163 : AFUB\_079080, AFUB\_096660  
 Afu5g14980 Chr5\_A\_fumigatus\_Af293:3,874,539..3,877,890(+) Conserved protein of unknown function  
 Afu5g14990 Chr5\_A\_fumigatus\_Af293:3,878,797..3,880,632(-) protein of unknown function  
 Afu5g15000 Chr5\_A\_fumigatus\_Af293:3,880,881..3,882,138(-) Putative arsenate reductase  
 Afu5g15010 Chr5\_A\_fumigatus\_Af293:3,882,249..3,883,746(+) Putative arsenite efflux transporter  
 Afu5g15020 Chr5\_A\_fumigatus\_Af293:3,883,929..3,886,741(-) Arsenic methyltransferase  
 Afu5g15030 Chr5\_A\_fumigatus\_Af293:3,886,790..3,888,430(-) Putative Arsenic resistance protein  
 Afu5g15040 Chr5\_A\_fumigatus\_Af293:3,891,893..3,895,481(-) Ortholog of A. nidulans FGSC A4 : AN3546, A. fumigatus Af293 : Afu1g16170, Afu4g14400, Afu6g09300, A. niger CBS 513.88 : An08g11160, An04g08000 and A. oryzae RIB40 : AO090166000001  
 Afu5g15050 Chr5\_A\_fumigatus\_Af293:3,895,482..3,896,523(-) Has domain(s) with predicted electron carrier activity, heme binding, iron ion binding, oxidoreductase activity, acting on paired donors, with incorporation or reduction of molecular oxygen activity and role in oxidation-reduction process  
 Afu5g15060 Chr5\_A\_fumigatus\_Af293:3,896,707..3,900,558(+) Ortholog of A. nidulans FGSC A4 : AN1594, AN9314, A. niger CBS 513.88 : An18g02710, A. oryzae RIB40 : AO090023000073, Neosartorya fischeri NRRL 181 : NFIA\_009790 and Aspergillus wentii : Aspwe1\_0054582  
 Afu5g15070 Chr5\_A\_fumigatus\_Af293:3,901,027..3,902,701(-) Has domain(s) with predicted antioxidant activity, oxidoreductase activity, peroxidoreductase activity and role in oxidation-reduction process  
 Afu5g15080 Chr5\_A\_fumigatus\_Af293:3,906,826..3,907,128(-) Has domain(s) with predicted ATP binding, protein kinase activity and role in protein phosphorylation  
 Afu5g15140 Chr5\_A\_fumigatus\_Af293:3,934,049..3,934,255(-) protein of unknown function  
 Afu5g15150 Chr5\_A\_fumigatus\_Af293:3,942,655..3,944,487(-) protein of unknown function

DUP5

| Gene ID    | Genomic Location (Gene)                        | Product Description                                                                                                                |
|------------|------------------------------------------------|------------------------------------------------------------------------------------------------------------------------------------|
| Afu4g06160 | Chr4_A_fumigatus_Af293:1,580,191..1,583,864(+) | Branched-chain-amino-acid transaminase                                                                                             |
| Afu4g06170 | Chr4_A_fumigatus_Af293:1,588,352..1,590,771(+) | Has domain(s) with predicted sequence-specific DNA binding, transcription factor activity, sequence-specific DNA binding activ     |
| Afu4g06180 | Chr4_A_fumigatus_Af293:1,591,035..1,595,980(-) | Ortholog(s) have protein serine/threonine kinase inhibitor activity                                                                |
| Afu4g06190 | Chr4_A_fumigatus_Af293:1,596,221..1,598,467(-) | Putative fungal specific transcription factor                                                                                      |
| Afu4g06200 | Chr4_A_fumigatus_Af293:1,599,168..1,601,178(-) | Ortholog of A. nidulans FGSC A4 : AN6683, AN8537, AN5260 and A. niger CBS 513.88 : An12g04370, An11g06510, An14g01260              |
| Afu4g06210 | Chr4_A_fumigatus_Af293:1,601,764..1,603,146(+) | Ortholog of A. nidulans FGSC A4 : AN10542, A. niger CBS 513.88 : An04g00510, A. oryzae RIB40 : AO090023000969, Aspergillus         |
| Afu4g06220 | Chr4_A_fumigatus_Af293:1,603,168..1,603,958(+) | Ortholog of A. nidulans FGSC A4 : AN10547, A. oryzae RIB40 : AO090023000968, Neosartorya fischeri NRRL 181 : NFIA_109920           |
| Afu4g06230 | Chr4_A_fumigatus_Af293:1,604,141..1,607,360(-) | Ortholog(s) have role in positive regulation of (R)-carnitine transmembrane transport, positive regulation of polyamine transme    |
| Afu4g06240 | Chr4_A_fumigatus_Af293:1,609,280..1,609,811(+) | Has domain(s) with predicted heme binding activity                                                                                 |
| Afu4g06250 | Chr4_A_fumigatus_Af293:1,610,044..1,612,266(-) | Ortholog(s) have role in cellular response to drug and nucleolus localization                                                      |
| Afu4g06260 | Chr4_A_fumigatus_Af293:1,612,405..1,614,216(+) | Ortholog(s) have polyubiquitin binding activity and role in double-strand break repair via single-strand annealing, removal of nc  |
| Afu4g06275 | Chr4_A_fumigatus_Af293:1,614,220..1,617,160(+) | Ortholog of A. nidulans FGSC A4 : AN0227, A. fumigatus Af293 : Afu3g12020, Afu5g10910, A. niger CBS 513.88 : An14g03700, A         |
| Afu4g06290 | Chr4_A_fumigatus_Af293:1,617,227..1,619,928(-) | Ortholog(s) have sphingosine N-acyltransferase activity and role in filamentous growth of a population of unicellular organisms,   |
| Afu4g06300 | Chr4_A_fumigatus_Af293:1,619,945..1,621,703(-) | Ortholog of A. nidulans FGSC A4 : AN4333, A. oryzae RIB40 : AO090023000961, Neosartorya fischeri NRRL 181 : NFIA_109850, ,         |
| Afu4g06310 | Chr4_A_fumigatus_Af293:1,622,288..1,622,838(-) | Ortholog of Aspergillus fumigatus A1163 : AFUB_063430                                                                              |
| Afu4g06320 | Chr4_A_fumigatus_Af293:1,624,724..1,625,106(+) | Ortholog of A. nidulans FGSC A4 : AN4340, A. niger CBS 513.88 : An04g00650, Neosartorya fischeri NRRL 181 : NFIA_109830 an         |
| Afu4g06330 | Chr4_A_fumigatus_Af293:1,625,616..1,626,767(-) | Ortholog of A. nidulans FGSC A4 : AN4341, A. niger CBS 513.88 : An04g00660, A. oryzae RIB40 : AO090023000957, Aspergillus          |
| Afu4g06340 | Chr4_A_fumigatus_Af293:1,627,154..1,627,946(+) | Ortholog(s) have endoplasmic reticulum localization                                                                                |
| Afu4g06350 | Chr4_A_fumigatus_Af293:1,628,898..1,630,750(-) | Has domain(s) with predicted nucleic acid binding, nucleotide binding activity                                                     |
| Afu4g06360 | Chr4_A_fumigatus_Af293:1,630,810..1,632,062(+) | Has domain(s) with predicted RNA binding activity, role in mRNA processing and cytoplasm, nucleus localization                     |
| Afu4g06370 | Chr4_A_fumigatus_Af293:1,632,129..1,634,165(-) | Ortholog of A. niger CBS 513.88 : An04g00710, Neosartorya fischeri NRRL 181 : NFIA_109780, Aspergillus wentii : Aspwe1_002:        |
| Afu4g06380 | Chr4_A_fumigatus_Af293:1,634,195..1,636,139(-) | Putative sterol carrier protein                                                                                                    |
| Afu4g06390 | Chr4_A_fumigatus_Af293:1,638,303..1,639,644(+) | Ortholog(s) have mitochondrion localization                                                                                        |
| Afu4g06400 | Chr4_A_fumigatus_Af293:1,640,020..1,642,754(+) | Ortholog(s) have role in cellular response to lithium ion, cellular response to neutral pH, entry into host and filamentous growth |
| Afu4g06410 | Chr4_A_fumigatus_Af293:1,642,832..1,643,843(-) | Ortholog of Neosartorya fischeri NRRL 181 : NFIA_109740, Aspergillus wentii : Aspwe1_0023328, Aspergillus fumigatus A1163 :        |
| Afu4g06420 | Chr4_A_fumigatus_Af293:1,643,911..1,646,582(-) | Putative fungal specific transcription factor                                                                                      |
| Afu4g06430 | Chr4_A_fumigatus_Af293:1,647,247..1,647,828(-) | Ortholog of Aspergillus fumigatus A1163 : AFUB_063549                                                                              |
| Afu4g06460 | Chr4_A_fumigatus_Af293:1,650,012..1,653,136(-) | Has domain(s) with predicted 3-dehydroquinone dehydratase activity, catalytic activity                                             |
| Afu4g06480 | Chr4_A_fumigatus_Af293:1,654,167..1,658,353(-) | Has domain(s) with predicted role in intracellular signal transduction                                                             |
| Afu4g06490 | Chr4_A_fumigatus_Af293:1,661,540..1,664,377(-) | Ortholog(s) have role in meiotic mismatch repair, reciprocal meiotic recombination and MutLgamma complex, nucleus localiza         |
| Afu4g06500 | Chr4_A_fumigatus_Af293:1,665,914..1,667,157(-) | Ortholog of A. nidulans FGSC A4 : AN4362, A. oryzae RIB40 : AO090023000936, Neosartorya fischeri NRRL 181 : NFIA_003290, I         |
| Afu4g06510 | Chr4_A_fumigatus_Af293:1,667,731..1,671,333(-) | Ortholog of A. nidulans FGSC A4 : AN1972, AN4371, A. niger CBS 513.88 : An04g05970, An08g04550, A. oryzae RIB40 : AO0900           |
| Afu4g06520 | Chr4_A_fumigatus_Af293:1,671,673..1,673,936(+) | Ortholog of A. nidulans FGSC A4 : AN4364, A. niger CBS 513.88 : An04g00860, A. oryzae RIB40 : AO090023000934, Aspergillus          |
| Afu4g06530 | Chr4_A_fumigatus_Af293:1,676,511..1,679,413(-) | bZip transcription factor, putative                                                                                                |
| Afu4g06540 | Chr4_A_fumigatus_Af293:1,680,790..1,682,202(+) | Ortholog(s) have structural molecule activity                                                                                      |
| Afu4g06550 | Chr4_A_fumigatus_Af293:1,682,651..1,684,353(-) | Has domain(s) with predicted zinc ion binding activity                                                                             |
| Afu4g06560 | Chr4_A_fumigatus_Af293:1,684,493..1,686,070(+) | Ortholog of Aspergillus fumigatus A1163 : AFUB_063640 and Aspergillus terreus NIH2624 : ATET_05579                                 |



## DUP5

|            |                                                |                                                                                                                                                                                               |
|------------|------------------------------------------------|-----------------------------------------------------------------------------------------------------------------------------------------------------------------------------------------------|
| Afu4g06570 | Chr4_A_fumigatus_Af293:1,686,920..1,690,724(-) | Ortholog(s) have hyphal tip localization                                                                                                                                                      |
| Afu4g06580 | Chr4_A_fumigatus_Af293:1,691,358..1,691,597(+) | Ortholog of <i>Aspergillus fumigatus</i> A1163 : AFUB_063660                                                                                                                                  |
| Afu4g06590 | Chr4_A_fumigatus_Af293:1,695,590..1,699,886(+) | Ortholog of <i>Neosartorya fischeri</i> NRRL 181 : NFIA_109600 and <i>Aspergillus fumigatus</i> A1163 : AFUB_063670                                                                           |
| Afu4g06600 | Chr4_A_fumigatus_Af293:1,700,116..1,703,381(-) | Has domain(s) with predicted RNA polymerase II transcription cofactor activity, role in regulation of transcription from RNA pol                                                              |
| Afu4g06610 | Chr4_A_fumigatus_Af293:1,703,777..1,707,458(-) | Ortholog of <i>A. nidulans</i> FGSC A4 : AN2913, AN4375, <i>A. fumigatus</i> Af293 : Afu3g07740, <i>A. niger</i> CBS 513.88 : An04g00930 and <i>A.</i>                                        |
| Afu4g06620 | Chr4_A_fumigatus_Af293:1,711,767..1,714,021(+) | Glutamate/Leucine/Phenylalanine/Valine dehydrogenase                                                                                                                                          |
| Afu4g06630 | Chr4_A_fumigatus_Af293:1,714,079..1,717,387(-) | Has domain(s) with predicted role in transmembrane transport and integral component of membrane localization                                                                                  |
| Afu4g06640 | Chr4_A_fumigatus_Af293:1,719,069..1,721,809(+) | Has domain(s) with predicted hydrolase activity                                                                                                                                               |
| Afu4g06660 | Chr4_A_fumigatus_Af293:1,725,435..1,726,346(-) | Ortholog of <i>Aspergillus fumigatus</i> A1163 : AFUB_063740                                                                                                                                  |
| Afu4g06670 | Chr4_A_fumigatus_Af293:1,726,811..1,728,795(-) | Allergen Asp f 7                                                                                                                                                                              |
| Afu4g06690 | Chr4_A_fumigatus_Af293:1,730,762..1,734,332(-) | Ortholog(s) have CDP reductase activity, nucleoside diphosphate kinase activity, nucleotide binding activity                                                                                  |
| Afu4g06700 | Chr4_A_fumigatus_Af293:1,734,334..1,735,654(-) | Ortholog of <i>A. nidulans</i> FGSC A4 : AN1338, AN9450, AN4381, <i>A. fumigatus</i> Af293 : Afu1g03040, Afu1g09510 and <i>A. niger</i> CBS 513.88 : An04g00930                               |
| Afu4g06710 | Chr4_A_fumigatus_Af293:1,735,766..1,737,047(-) | Ortholog(s) have ATPase activity and cytosol, nucleus localization                                                                                                                            |
| Afu4g06730 | Chr4_A_fumigatus_Af293:1,737,114..1,739,076(-) | Ortholog of <i>A. nidulans</i> FGSC A4 : AN4383, <i>A. niger</i> CBS 513.88 : An04g01110, <i>A. oryzae</i> RIB40 : AO090023000913, <i>Aspergillus fumigatus</i> A1163 : AFUB_063660           |
| Afu4g06740 | Chr4_A_fumigatus_Af293:1,739,546..1,741,125(+) | Ortholog(s) have cytosol, mitochondrion localization                                                                                                                                          |
| Afu4g06750 | Chr4_A_fumigatus_Af293:1,741,249..1,746,859(+) | Ortholog(s) have role in actomyosin contractile ring assembly, ascospore formation, sporocarp development involved in sexual reproduction                                                     |
| Afu4g06760 | Chr4_A_fumigatus_Af293:1,746,944..1,749,433(+) | Ortholog(s) have role in lipid homeostasis, mitochondrion organization and integral component of mitochondrial membrane, rRNA processing                                                      |
| Afu4g06770 | Chr4_A_fumigatus_Af293:1,749,552..1,751,095(-) | Ortholog(s) have 2 iron, 2 sulfur cluster binding, ferrous iron binding, iron-sulfur transferase activity                                                                                     |
| Afu4g06780 | Chr4_A_fumigatus_Af293:1,752,595..1,754,935(-) | Ortholog(s) have NAD transporter activity, pyruvate secondary active transmembrane transporter activity, role in NAD transmembrane transport                                                  |
| Afu4g06790 | Chr4_A_fumigatus_Af293:1,755,390..1,756,027(+) | Ubiquinol-cytochrome c reductase complex 14 kDa protein with a predicted role in oxidative phosphorylation                                                                                    |
| Afu4g06800 | Chr4_A_fumigatus_Af293:1,756,157..1,758,180(-) | Ortholog(s) have DNA-3-methyladenine glycosylase activity, damaged DNA binding activity, role in DNA dealkylation involved in DNA repair                                                      |
| Afu4g06810 | Chr4_A_fumigatus_Af293:1,761,636..1,761,791(-) | Ortholog of <i>Aspergillus fumigatus</i> A1163 : AFUB_063880                                                                                                                                  |
| Afu4g06820 | Chr4_A_fumigatus_Af293:1,762,193..1,763,534(+) | Putative glycoposphatidylinositol (GPI)-anchored cell wall protein with similarity to <i>S. cerevisiae</i> Ecm33p                                                                             |
| Afu4g06830 | Chr4_A_fumigatus_Af293:1,764,215..1,765,322(-) | Ortholog(s) have SUMO transferase activity, role in hyphal growth, mitotic spindle elongation, protein sumoylation and condensin complex assembly                                             |
| Afu4g06840 | Chr4_A_fumigatus_Af293:1,765,448..1,768,207(-) | Has domain(s) with predicted nucleic acid binding, nucleotide binding activity                                                                                                                |
| Afu4g06850 | Chr4_A_fumigatus_Af293:1,768,319..1,770,087(+) | Ortholog(s) have cytosol, glyoxysome localization                                                                                                                                             |
| Afu4g06860 | Chr4_A_fumigatus_Af293:1,770,090..1,770,590(-) | Ortholog of <i>Aspergillus fumigatus</i> A1163 : AFUB_063930                                                                                                                                  |
| Afu4g06870 | Chr4_A_fumigatus_Af293:1,771,306..1,774,301(-) | Ortholog of <i>A. nidulans</i> FGSC A4 : AN4395, <i>A. niger</i> CBS 513.88 : An04g01260, <i>A. oryzae</i> RIB40 : AO090023000901, <i>Aspergillus fumigatus</i> A1163 : AFUB_063880           |
| Afu4g06880 | Chr4_A_fumigatus_Af293:1,774,383..1,776,973(-) | protein of unknown function                                                                                                                                                                   |
| Afu4g06890 | Chr4_A_fumigatus_Af293:1,780,884..1,785,331(-) | 14-alpha sterol demethylase                                                                                                                                                                   |
| Afu4g06900 | Chr4_A_fumigatus_Af293:1,787,004..1,789,825(+) | Ortholog(s) have asparagine synthase (glutamine-hydrolyzing) activity, role in asparagine biosynthetic process and cytosol, nucleus localization                                              |
| Afu4g06910 | Chr4_A_fumigatus_Af293:1,789,863..1,791,391(+) | Putative outer mitochondrial membrane protein porin                                                                                                                                           |
| Afu4g06920 | Chr4_A_fumigatus_Af293:1,791,595..1,793,040(-) | Ortholog of <i>A. nidulans</i> FGSC A4 : AN4403, <i>Aspergillus wentii</i> : Aspwe1_0167198, <i>Aspergillus sydowii</i> : Aspsy1_0162965 and <i>Aspergillus fumigatus</i> A1163 : AFUB_063880 |
| Afu4g06930 | Chr4_A_fumigatus_Af293:1,793,635..1,795,535(+) | Ortholog(s) have cytosol localization                                                                                                                                                         |
| Afu4g06940 | Chr4_A_fumigatus_Af293:1,795,602..1,797,234(+) | Ortholog(s) have sphingolipid delta-4 desaturase activity, role in cellular response to glucose starvation, hyphal growth, response to oxidative stress                                       |
| Afu4g06950 | Chr4_A_fumigatus_Af293:1,797,998..1,799,592(-) | Putative endoplasmic reticulum (ER) type II integral membrane protein with a predicted role in protein transport                                                                              |
| Afu4g06960 | Chr4_A_fumigatus_Af293:1,800,295..1,801,952(+) | Ortholog(s) have cytosol, nucleus localization                                                                                                                                                |
| Afu4g06970 | Chr4_A_fumigatus_Af293:1,801,970..1,804,581(+) | Ortholog(s) have single-stranded DNA binding activity                                                                                                                                         |

## DUP5

|            |                                                |                                                                                                                                        |
|------------|------------------------------------------------|----------------------------------------------------------------------------------------------------------------------------------------|
| Afu4g06980 | Chr4_A_fumigatus_Af293:1,805,075..1,808,198(-) | Ortholog of A. nidulans FGSC A4 : AN4429, A. niger CBS 513.88 : An04g01380, Neosartorya fischeri NRRL 181 : NFIA_109260, As            |
| Afu4g06990 | Chr4_A_fumigatus_Af293:1,809,133..1,811,105(-) | Ortholog(s) have endoplasmic reticulum localization                                                                                    |
| Afu4g07000 | Chr4_A_fumigatus_Af293:1,813,976..1,814,860(-) | Ortholog(s) have role in actin filament organization, endocytosis and cytosol, nucleus localization                                    |
| Afu4g07010 | Chr4_A_fumigatus_Af293:1,815,689..1,817,552(-) | Ortholog(s) have cytosol, nucleus localization                                                                                         |
| Afu4g07020 | Chr4_A_fumigatus_Af293:1,817,715..1,820,221(+) | Has domain(s) with predicted catalytic activity, heme binding, oxidoreductase activity                                                 |
| Afu4g07030 | Chr4_A_fumigatus_Af293:1,821,787..1,823,809(+) | Transcript up-regulated in conidia exposed to neutrophils                                                                              |
| Afu4g07040 | Chr4_A_fumigatus_Af293:1,825,983..1,827,407(+) | Putative secreted aspartic-type endopeptidase                                                                                          |
| Afu4g07050 | Chr4_A_fumigatus_Af293:1,827,769..1,829,194(-) | Putative lactate dehydrogenase                                                                                                         |
| Afu4g07060 | Chr4_A_fumigatus_Af293:1,830,102..1,831,555(+) | Ortholog of A. nidulans FGSC A4 : AN10552, A. niger CBS 513.88 : An04g01460, A. oryzae RIB40 : AO090023000870, Aspergillus             |
| Afu4g07070 | Chr4_A_fumigatus_Af293:1,831,859..1,832,638(+) | Ortholog of A. nidulans FGSC A4 : AN10554, A. oryzae RIB40 : AO090023000869, Aspergillus wentii : Aspwe1_0248748, Aspergi              |
| Afu4g07080 | Chr4_A_fumigatus_Af293:1,834,826..1,839,269(-) | Ortholog(s) have protein tyrosine phosphatase activity                                                                                 |
| Afu4g07090 | Chr4_A_fumigatus_Af293:1,841,830..1,845,671(+) | Ortholog of A. nidulans FGSC A4 : AN4418, A. niger CBS 513.88 : An04g01500, A. oryzae RIB40 : AO090023000866, Aspergillus              |
| Afu4g07100 | Chr4_A_fumigatus_Af293:1,846,677..1,848,956(-) | Ortholog(s) have protein anchor activity and role in establishment of spindle pole body localization to nuclear envelope, mitoti       |
| Afu4g07110 | Chr4_A_fumigatus_Af293:1,849,132..1,850,125(+) | Ortholog(s) have SNAP receptor activity, role in Golgi to vacuole transport, vacuole inheritance and Golgi apparatus, endoplasm        |
| Afu4g07120 | Chr4_A_fumigatus_Af293:1,850,501..1,851,364(-) | Ortholog(s) have holocytochrome-c synthase activity, role in cytochrome c-heme linkage and cytosol, mitochondrial intermem             |
| Afu4g07130 | Chr4_A_fumigatus_Af293:1,851,561..1,852,972(+) | Diphosphomevalonate decarboxylase                                                                                                      |
| Afu4g07140 | Chr4_A_fumigatus_Af293:1,853,307..1,857,890(-) | Ortholog(s) have tRNA binding activity, role in regulation of transcription from RNA polymerase II promoter, tRNA wobble uridi         |
| Afu4g07150 | Chr4_A_fumigatus_Af293:1,858,042..1,858,554(-) | Has domain(s) with predicted cytochrome-c oxidase activity                                                                             |
| Afu4g07160 | Chr4_A_fumigatus_Af293:1,858,801..1,862,723(+) | Ortholog(s) have role in regulation of circadian rhythm and TRAMP complex localization                                                 |
| Afu4g07170 | Chr4_A_fumigatus_Af293:1,862,823..1,864,802(+) | Ortholog(s) have polyubiquitin binding, sterol binding activity and role in anaphase-promoting complex-dependent proteasom             |
| Afu4g07180 | Chr4_A_fumigatus_Af293:1,864,856..1,866,797(-) | Ortholog of A. niger CBS 513.88 : An04g01590, A. oryzae RIB40 : AO090023000857, Aspergillus wentii : Aspwe1_0247174, Asp               |
| Afu4g07190 | Chr4_A_fumigatus_Af293:1,866,827..1,868,341(-) | Ornathine carbamoyltransferase, enzyme of the arginine biosynthesis pathway                                                            |
| Afu4g07200 | Chr4_A_fumigatus_Af293:1,868,370..1,871,510(+) | Ortholog of A. nidulans FGSC A4 : AN4408, A. niger CBS 513.88 : An04g01600, A. oryzae RIB40 : AO090023000855, Aspergillus              |
| Afu4g07210 | Chr4_A_fumigatus_Af293:1,871,931..1,873,065(-) | Mitochondrial acetolactate synthase small subunit                                                                                      |
| Afu4g07220 | Chr4_A_fumigatus_Af293:1,873,275..1,875,950(+) | Has domain(s) with predicted RNA binding activity                                                                                      |
| Afu4g07230 | Chr4_A_fumigatus_Af293:1,875,953..1,878,037(-) | Has domain(s) with predicted ATP binding, ATP-dependent helicase activity, helicase activity, nucleic acid binding activity and r      |
| Afu4g07240 | Chr4_A_fumigatus_Af293:1,878,162..1,881,163(-) | Ortholog of A. nidulans FGSC A4 : AN4433, A. niger CBS 513.88 : An04g01640, A. oryzae RIB40 : AO090023000851, Aspergillus              |
| Afu4g07250 | Chr4_A_fumigatus_Af293:1,881,262..1,882,555(+) | Ortholog(s) have structural constituent of ribosome activity and mitochondrial small ribosomal subunit localization                    |
| Afu4g07260 | Chr4_A_fumigatus_Af293:1,882,640..1,886,990(+) | Ortholog(s) have role in positive regulation of establishment of bipolar cell polarity regulating cell shape and cell division site, c |
| Afu4g07270 | Chr4_A_fumigatus_Af293:1,887,031..1,890,751(-) | Putative serine carboxypeptidase                                                                                                       |
| Afu4g07280 | Chr4_A_fumigatus_Af293:1,891,760..1,895,289(+) | cAMP-mediated signaling protein                                                                                                        |
| Afu4g07290 | Chr4_A_fumigatus_Af293:1,895,297..1,896,766(+) | Ortholog(s) have Y-form DNA binding, crossed form four-way junction DNA binding, crossover junction endodeoxyribonuclease              |
| Afu4g07300 | Chr4_A_fumigatus_Af293:1,896,828..1,898,857(-) | Predicted adhesin-like protein                                                                                                         |
| Afu4g07310 | Chr4_A_fumigatus_Af293:1,901,441..1,902,310(+) | Ortholog(s) have ATPase activity, nicotinamide-nucleotide adenyltransferase activity                                                   |
| Afu4g07320 | Chr4_A_fumigatus_Af293:1,902,522..1,903,550(-) | Ortholog of Aspergillus fumigatus A1163 : AFUB_064410                                                                                  |
| Afu4g07330 | Chr4_A_fumigatus_Af293:1,903,569..1,905,072(+) | Ortholog(s) have endoplasmic reticulum localization                                                                                    |
| Afu4g07340 | Chr4_A_fumigatus_Af293:1,905,396..1,909,011(+) | Ortholog(s) have cytoplasm, nucleus localization                                                                                       |
| Afu4g07350 | Chr4_A_fumigatus_Af293:1,909,677..1,910,880(+) | Ortholog(s) have endoplasmic reticulum localization                                                                                    |

## DUP5

|            |                                                |                                                                                                                                |
|------------|------------------------------------------------|--------------------------------------------------------------------------------------------------------------------------------|
| Afu4g07360 | Chr4_A_fumigatus_Af293:1,911,526..1,914,475(-) | Putative cobalamin-independent methionine synthase                                                                             |
| Afu4g07370 | Chr4_A_fumigatus_Af293:1,914,653..1,917,944(+) | Ortholog of A. niger CBS 513.88 : An04g01760, Neosartorya fischeri NRRL 181 : NFIA_108850, Aspergillus versicolor : Aspve1_0   |
| Afu4g07380 | Chr4_A_fumigatus_Af293:1,918,233..1,920,251(-) | Ortholog(s) have role in histone exchange and NuA4 histone acetyltransferase complex, Swr1 complex localization                |
| Afu4g07390 | Chr4_A_fumigatus_Af293:1,920,338..1,921,660(+) | Ortholog(s) have Golgi apparatus, endoplasmic reticulum localization                                                           |
| Afu4g07400 | Chr4_A_fumigatus_Af293:1,921,677..1,925,436(-) | Has domain(s) with predicted ATP binding, phosphorelay response regulator activity, phosphorelay sensor kinase activity, signa |
| Afu4g07410 | Chr4_A_fumigatus_Af293:1,925,466..1,927,837(+) | Has domain(s) with predicted catalytic activity                                                                                |
| Afu4g07420 | Chr4_A_fumigatus_Af293:1,928,130..1,928,941(-) | Ortholog(s) have endopeptidase activator activity and role in proteasomal ubiquitin-independent protein catabolic process, pro |
